# Supplementary material for: Neutral nickel complexes with tetradentate N-heterocyclic carbene amidate ligands for electrocatalytic hydrogen evolution
Source: Royal Society of Chemistry journal article supplement (doi:10.1039/d4dt02746a), 2024-01-01

## Electronic Supplementary Information

### Neutral nickel complexes with tetradentate *N*-heterocyclic carbene amidate ligands for electrocatalytic hydrogen evolution

Si Si,<sup>a</sup> Wenxun Song,<sup>a</sup> Jie Chen,<sup>\*a</sup> Weimin Zhang,<sup>a</sup> Wenhua Ji,<sup>c</sup> Wonwoo  
Nam,<sup>\*b</sup> and Bin Wang<sup>\*a</sup>

<sup>a</sup> *School of Chemistry and Chemical Engineering, University of Jinan, Jinan 250022,  
Shandong Province, China.*

<sup>b</sup> *Department of Chemistry and Nano Science, Ewha Womans University, Seoul 03760,  
Korea.*

<sup>c</sup> *Key Laboratory for Applied Technology of Sophisticated Analytical Instruments of  
Shandong Province, Shandong Analysis and Test Center, Qilu University of Technology  
(Shandong Academy of Sciences), Jinan 250014, China.*

\*To whom correspondence should be addressed.

chm\_chenj@ujn.edu.cn

wwnam@ewha.ac.kr

chm\_wangb@ujn.edu.cn

## Table of Contents

|                                                                       |     |
|-----------------------------------------------------------------------|-----|
| Experimental Section .....                                            | S3  |
| Electrochemical Measurements .....                                    | S4  |
| Calculation Methods of TOFs from Electrochemical Data .....           | S5  |
| Determination of Overpotential with TFA in CH <sub>3</sub> CN .....   | S6  |
| Calculation Methods of Faraday Efficiency (FE).....                   | S7  |
| General Procedure for Ligand Synthesis .....                          | S8  |
| Synthesis and Characterization of Nickel(II) Complexes.....           | S12 |
| References.....                                                       | S15 |
| Table S1 .....                                                        | S16 |
| Table S2 .....                                                        | S17 |
| Table S3 .....                                                        | S18 |
| Table S4 .....                                                        | S19 |
| Fig. S1.....                                                          | S21 |
| Fig. S2.....                                                          | S22 |
| Fig. S3.....                                                          | S23 |
| Fig. S4.....                                                          | S24 |
| Fig. S5.....                                                          | S25 |
| Fig. S6.....                                                          | S26 |
| Fig. S7.....                                                          | S27 |
| Fig. S8.....                                                          | S28 |
| Additional Data: <sup>1</sup> H and <sup>13</sup> C NMR Spectra ..... | S29 |

## Experimental Section

**Materials.** Chemicals were purchased from commercial sources. Organic solvents used were analytical grade. Solvents were dried according to published procedures and distilled under argon prior to use.

**Apparatuses.** NMR spectra were recorded on Bruker Avance III 400 (400 MHz for  $^1\text{H}$ ; 100 MHz for  $^{13}\text{C}$ ) or Bruker Avance III 600 (600 MHz for  $^1\text{H}$ ; 150 MHz for  $^{13}\text{C}$ ). For X-ray structural analysis, crystallographic data collections were carried out on a Bruker SMART AXS diffractometer equipped with a monochromator in the Mo  $\text{K}\alpha$  ( $\lambda = 0.71073 \text{ \AA}$ ) incident beam. Gas analysis for bulk electrolysis experiments were performed using 50  $\mu\text{L}$  sample injections on a Beifen 6890A series gas chromatograph. Gas sample  $\text{H}_2$  was analyzed using thermal conductivity detector (TCD), stainless-steel column packed with molecular sieves ( $5 \text{ \AA} \times 3 \text{ m}$ ), and Ar as the carrier gas (flow rate =  $30 \text{ mL min}^{-1}$ ). Aliquots (50  $\mu\text{L}$ ) of the gas headspace were injected into the GC every time to analyze the gas products formed.

## Electrochemical Measurements

Electrochemical data were carried out in CHI-630E potentiostat instrument. Solution (total 5.0 mL) of the catalyst (1.0 mM) was placed in an undivided cell. Glassy carbon (GC, 3.0 mm of diameter) electrode was used as working electrode, Ag/AgCl with saturated KCl solution as reference electrode and Pt wire as counter electrode. Before each measurement, working electrode was polished with 0.05  $\mu\text{m}$  alumina paste and rinsed with  $\text{HNO}_3$ , acetone, ethanol, and water, respectively. All redox potentials in the present work are reported versus  $\text{Fc}/\text{Fc}^+$ . Tetrabutylammonium hexafluorophosphate ( $n\text{-Bu}_4\text{NPF}_6$ ) (0.10 M) was used as a supporting electrolyte in dry  $\text{CH}_3\text{CN}$ . All the electrochemical reactions were conducted under  $\text{N}_2$  atmosphere. Controlled potential electrolysis (CPE) experiment was conducted in a 10 mL Schlenk tube. Glassy carbon (GC, 3.0 mm of diameter) electrode was used as working electrode, Ag/AgCl with saturated KCl solution as reference electrode and Pt wire as counter electrode. 5.0 mL samples were prepared as 1.0 mM catalyst, 0.1 M  $n\text{-Bu}_4\text{NPF}_6$ , and 0.2 M trifluoroacetic acid. Before each measurement, the electrolyte was conducted under  $\text{N}_2$  atmosphere for 30 min. CPE was operated for 3 hours. Applied potential was  $-1.6\text{ V}$  vs  $\text{Fc}/\text{Fc}^+$ . Gas analysis for CPE was performed using 1 mL sample aliquots taken from the headspace of the electrochemical cell and injected on GC equipment. The faradaic efficiency of each experiment was determined by dividing the measured amount of  $\text{H}_2$  by passed charge during CPE.

## Calculation Methods of TOFs from Electrochemical Data

TOFs were calculated by using cyclic voltammograms. In cyclic voltammograms at a certain concentration of acid, the catalytic current is proportional to the concentration of catalyst([cat]), acid concentration ([Q]<sup>y</sup>), diffusion coefficient (D), electrode surface area (A), and rate constant of catalytic reaction (*k*<sub>cat</sub>) (eq S1). If the concentration of catalyst is sufficiently smaller than acid, the catalytic reaction can be assumed as pseudo-first-reaction for acid (y = 1). The rate of catalytic reaction can be obtained by squaring (*i*<sub>cat</sub>/*i*<sub>p</sub>) and arranging the equation for *k*<sub>cat</sub>[Q]. *i*<sub>p</sub> can be illustrated by the Randles-Sevcik equation (eq S2) and dividing *i*<sub>cat</sub> by *i*<sub>p</sub> can cancel out electrode surface area (A) and diffusion coefficient (D) (eq S3). Equation 3 can be described easier by calculating constant as shown in eq S4.

$$i_{cat} = n_{cat}FA[cat]\sqrt{Dk_{cat}[Q]^y} \quad (\text{eq S1})$$

$$i_p = 0.446n_pFA[cat]\sqrt{\frac{n_pFvD}{RT}} \quad (\text{eq S2})$$

$$\text{Rate of catalytic reaction (TOF, s}^{-1}\text{)} = k_{cat}[Q] = \frac{Fvn_p^3}{RT} \left(\frac{0.4463}{n_{cat}}\right)^2 \left(\frac{i_{cat}}{i_p}\right)^2 \quad (\text{eq S3})$$

$$\text{TOF} = k_{cat}[Q] = 1.94 v \left(\frac{i_{cat}}{i_p}\right)^2 \quad (\text{eq S4})$$

## Determination of Overpotential with TFA in CH<sub>3</sub>CN

The determination of overpotential from cyclic voltammograms includes taking the potential value at a specific dot on these curves and weighing up it to the corresponding theoretical points for an electrochemically reversible process. Since the  $pK_a$  ( $pK_a^{\text{MeCN}} = 12.7$ ) and the standard redox potential of TFA in MeCN ( $E_{\text{H}^+/\text{H}_2}^\circ = -0.07$  V) are reported<sup>S1,S2</sup>, the equilibrium potential ( $E_{\text{AH}/\text{H}_2, \text{A}^-}^\circ = -0.82$  V) can be calculated according to eq S5 using Evans' expression<sup>S3</sup>. The well-defined potential on voltammograms corresponding the half the maximum current of catalytic current is  $E_{\text{cat}/2}$ . This value can be read straightly on experimental GC voltammograms. The overpotential of the electrocatalytic proton reduction catalyzed by nickel complex was measured using eq S6.

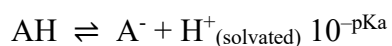

$$E_{\text{AH}}^\circ = E_{\text{H}^+/\text{H}_2}^\circ - \frac{2.303RT}{F} pK_a \text{ (eq S5)}$$

$$\text{Overpotential} = |E_{\text{AH}}^\circ - E_{\text{cat}/2}| \text{ (eq S6)}$$

## Calculation Methods of Faraday Efficiency (FE)

Generally, FE is determined by the equation

$$FE = n(\text{H}_2)/(Q/2F) = 2Fn(\text{H}_2)/Q \text{ (eq S7)}$$

During the constant potential electrolysis (CPE) of **3**, total charge consumed was 34.8 C in 3 hours and  $1.15 \times 10^{-4}$  mol  $\text{H}_2$  gas was collected in a home-made set up.

$$\text{Therefore, Faraday efficiency (FE)} = (2 \times 96485 \times 115 \times 10^{-6})/34.8 = 63.8\%$$

## General Procedure for Ligand Synthesis

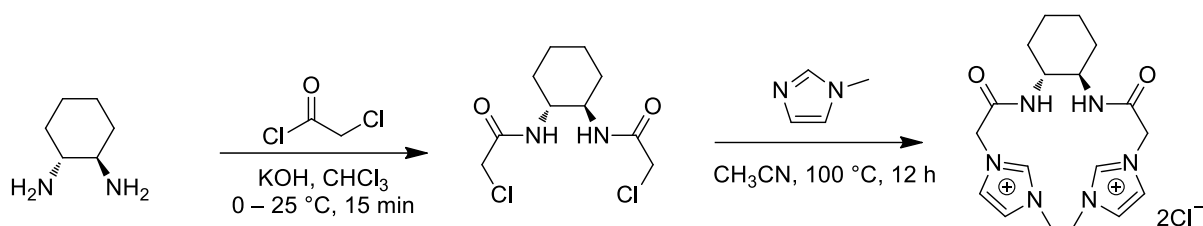

### *N,N'*-(((1*R*,2*R*)-Cyclohexane-1,2-diyl)bis(2-chloroacetamide))

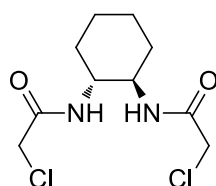

(1*R*,2*R*)-1,2-cyclohexanediamine (2.28 g, 20 mmol) was dissolved in CHCl<sub>3</sub> (50 mL), and KOH (2.25 g, 40 mmol) in H<sub>2</sub>O (20 mL) was added. Then, chloroacetyl chloride (4.52 g, 40 mmol) in CHCl<sub>3</sub> (50 mL) was added drop wise to the mixture with stirring at 0 °C. After 15 minutes, the solid was filtered and washed with Et<sub>2</sub>O (20 mL). Drying in *vacuo* yielded a solid (4.54 g, 17 mmol, 85%). The characterization data was identical to that reported in the literature.<sup>S4</sup>

<sup>1</sup>H NMR (600 MHz, CDCl<sub>3</sub>): δ 6.83 (s, 2H), 3.99 (d, *J* = 6.0 Hz, 4H), 3.75 (s, 2H), 2.07 (d, *J* = 6.0 Hz, 2H), 1.80 (dd, *J* = 24.0, 16.0 Hz, 2H), 1.34 (d, *J* = 6.0 Hz, 4H).

### 3,3'-(((1*R*,2*R*)-Cyclohexane-1,2-diylbis(azanediyl))bis(2-oxoethane-2,1-diyl))bis(1-methyl-1H-imidazol-3-ium)

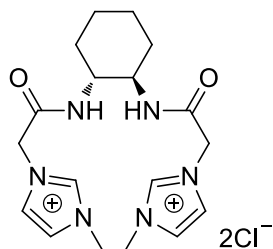

A solution of *N,N'*-(((1*R*,2*R*)-cyclohexane-1,2-diyl)bis(2-chloroacetamide)) (6.89 g, 25.8 mmol) and 1-methylimidazole (4.23 g, 51.5 mmol) in acetonitrile was refluxed at 100 °C for 12 h. The mixture was filtered, and the solvent was removed under reduced pressure, the product was



obtained as a solid (6.23 g, 14.4 mmol, 56%).

**<sup>1</sup>H NMR** (400 MHz, DMSO-*d*<sub>6</sub>): δ 9.50 – 9.30 (m, 2H), 8.59 – 8.43 (m, 2H), 7.87 – 7.78 (m, 2H), 7.76 – 7.68 (m, 2H), 5.26 – 5.13 (m, 2H), 4.97 (d, *J* = 17.0 Hz, 2H), 3.91 (s, 6H), 3.61 – 3.50 (m, 2H), 1.90 – 1.78 (m, 2H), 1.67 (d, *J* = 8.4 Hz, 2H), 1.40 – 1.18 (m, 4H).

**<sup>13</sup>C NMR** (100 MHz, DMSO-*d*<sub>6</sub>): δ 164.7, 137.8, 123.8, 122.8, 52.1, 50.5, 35.8, 31.1, 24.0.

**Anal. Calcd.** for C<sub>18</sub>H<sub>28</sub>Cl<sub>2</sub>N<sub>6</sub>O<sub>2</sub>: C, 50.12; H, 6.54; N, 19.48. Found: C, 50.20; H, 6.50; N, 19.42.

### *N,N'*-(1,2-Phenylene)bis(2-chloroacetamide)

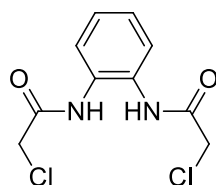

This compound was prepared from benzene-1,2-diamine (2.16 g, 20 mmol) using the method described above. The product was obtained as a solid (4.54 g, 17.4 mmol, 87%), and the characterization data was identical to that reported in the literature.<sup>S5</sup>

**<sup>1</sup>H NMR** (600 MHz, DMSO-*d*<sub>6</sub>): δ 9.81 (s, 2H), 7.56 (dd, *J* = 12.0, 6.0 Hz, 2H), 7.22 (dd, *J* = 12.0, 6.0 Hz, 2H), 4.35 (s, 4H).

### 3,3'-((1,2-Phenylenebis(azanediyl))bis(2-oxoethane-2,1-diyl))bis(1-methyl-1H-imidazol-3-ium)

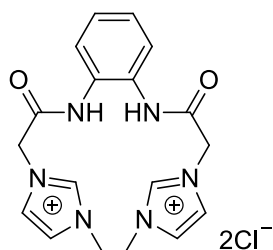

A solution of *N,N'*-(1,2-phenylene)bis(2-chloroacetamide) (6.74 g, 25.8 mmol) and 1-methylimidazole (4.23 g, 51.5 mmol) in acetonitrile was refluxed at 100 °C for 12 h. The mixture was filtered and the solvent was removed under reduced pressure, the product was obtained as a solid (10.75 g, 25.3 mmol, 98%), and the characterization data was identical to that reported in the literature.<sup>S5</sup>

**<sup>1</sup>H NMR** (600 MHz, DMSO-*d*<sub>6</sub>): δ 10.77 (s, 2H), 9.36 (s, 2H), 7.91 (s, 2H), 7.76 (s, 2H), 7.61 (s, 2H), 7.19 (s, 2H), 5.49 (s, 4H), 3.93 (s, 6H).

***N,N'*-(4,5-Dichloro-1,2-phenylene)bis(2-chloroacetamide)**

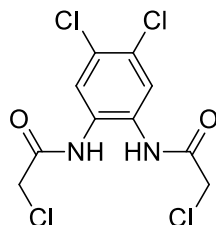

This compound was prepared from 4,5-dichlorobenzene-1,2-diamine (3.54 g, 20 mmol) using the method described above. The product was obtained as a solid powder (2.18 g, 6.6 mmol, 33%).

**<sup>1</sup>H NMR** (600 MHz, DMSO-*d*<sub>6</sub>): δ 9.99 (s, 2H), 7.88 (s, 2H), 4.37 (s, 4H).

**<sup>13</sup>C NMR** (150 MHz, DMSO-*d*<sub>6</sub>): δ 165.9, 130.5, 127.4, 126.4, 43.7.

**3,3'-(((4,5-Dichloro-1,2-phenylene)bis(azanediyl))bis(2-oxoethane-2,1-diyl))bis(1-methyl-1H-imidazol-3-ium)**

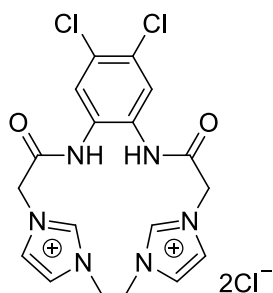

A solution of *N,N'*-(4,5-dichloro-1,2-phenylene)bis(2-chloroacetamide) (1.62 g, 4.9 mmol) and 1-methylimidazole (805 mg, 9.8 mmol) in acetonitrile was refluxed at 100 °C for 12 h. The mixture was filtered and the solvent was removed under reduced pressure, the product was obtained as a solid (2.11 g, 4.3 mmol, 87%).

**<sup>1</sup>H NMR** (600 MHz, DMSO-*d*<sub>6</sub>): δ 11.13 (s, 2H), 9.32 (s, 2H), 7.94 (s, 2H), 7.88 (s, 2H), 7.76 (s, 2H), 5.47 (s, 4H), 3.93 (s, 6H).

**<sup>13</sup>C NMR** (150 MHz, DMSO-*d*<sub>6</sub>): δ

164.8, 138.1, 137.7, 129.7, 126.5, 125.5, 125.3, 123.9, 123.8, 123.1, 51.5, 35.9.

**Anal. Calcd.** for  $C_{18}H_{20}Cl_4N_6O_2$ : C, 43.75; H, 4.08; N, 17.01. Found: C, 43.71; H, 4.14; N, 16.95.

## Synthesis and Characterization of Nickel(II) Complexes

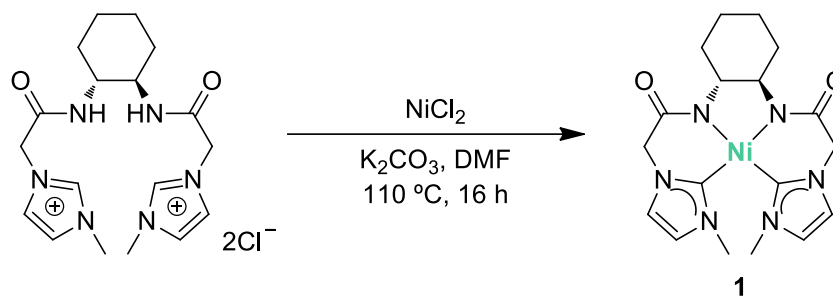

**Complex 1:** To a solution of 3,3'-(((1*R*,2*R*)-cyclohexane-1,2-diylbis(azanediyl))bis(2-oxoethane-2,1-diyl))bis(1-methyl-1*H*-imidazol-3-ium) (431 mg, 1.0 mmol) and  $\text{K}_2\text{CO}_3$  (691 mg, 5.0 mmol) in anhydrous *N,N*-dimethylformamide (15 mL), followed by the addition of a solution of  $\text{NiCl}_2$  (130 g, 1.0 mmol) in anhydrous *N,N*-dimethylformamide (10 mL). The resultant mixture was refluxed at  $110\text{ }^\circ\text{C}$  for 16 h, after that the reaction solution was cooled down to room temperature, the mixture was filtered and the solvent was removed under reduced pressure. Single crystals suitable for X-ray crystallographic analysis were obtained by slow diffusion of anhydrous diethyl ether into a *N,N*-dimethylformamide solution of complex 1 (308 mg, 0.74 mmol, 74%). CCDC 2366466 contains the supplementary crystallographic data for this paper. The data can be obtained free of charge from The Cambridge Crystallographic Data Centre via [www.ccdc.cam.ac.uk/structures](http://www.ccdc.cam.ac.uk/structures).

**$^1\text{H}$  NMR** (400 MHz,  $\text{DMSO-}d_6$ ):  $\delta$  7.31 – 7.23 (m, 4H), 4.71 (d,  $J = 17.6$  Hz, 2H), 4.48 (d,  $J = 17.6$  Hz, 2H), 3.12 (s, 6H), 3.07 (d,  $J = 7.3$  Hz, 2H), 2.79 (d,  $J = 11.4$  Hz, 2H), 1.55 – 1.45 (m, 2H), 1.24 – 1.14 (m, 2H), 0.73 – 0.59 (m, 2H).

**$^{13}\text{C}$  NMR** (101 MHz,  $\text{DMSO-}d_6$ )  $\delta$  169.7, 163.3, 123.7, 120.6, 68.4, 53.2, 36.3, 31.9, 25.6.

**Anal. Calcd.** for  $\text{C}_{18}\text{H}_{26}\text{N}_6\text{NiO}_2 \cdot \text{DMF}$ : C, 51.45; H, 6.79; N, 20.00. Found: C, 51.39; H, 6.75; N, 20.05.

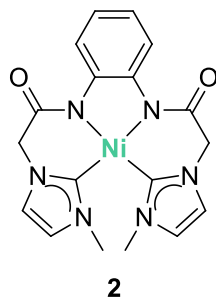

**Complex 2:** Following the general procedure for the preparation of complex **1** using the ligand of 3,3'-((1,2-phenylenebis(azanediyl))bis(2-oxoethane-2,1-diyl))bis(1-methyl-1H-imidazol-3-ium), provided the title complex as a pale yellow solid (325 mg, 0.79 mmol, 79% yield). The characterization data was identical to that reported in the literature.<sup>S5</sup>

**<sup>1</sup>H NMR** (600 MHz, DMSO-*d*<sub>6</sub>): δ 8.32 (dd, *J* = 6.0, 3.6 Hz, 2H), 7.43 (d, *J* = 1.8 Hz, 2H), 7.33 (d, *J* = 1.8 Hz, 2H), 6.66 (dd, *J* = 6.0, 3.6 Hz, 2H), 5.14 (d, *J* = 16.8 Hz, 2H), 4.68 (d, *J* = 11.4 Hz, 2H), 3.18 (s, 6H).

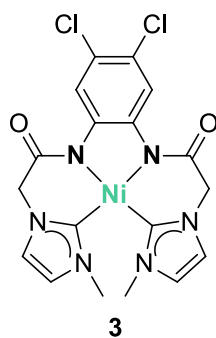

**Complex 3:** Following the general procedure for the preparation of complex **1** using the ligand of 3,3'-(((4,5-dichloro-1,2-phenylene)bis(azanediyl))bis(2-oxoethane-2,1-diyl))bis(1-methyl-1H-imidazol-3-ium), provided the title complex as a clear light yellow solid (403 mg, 0.84 mmol, 84% yield). Single crystals suitable for X-ray crystallographic analysis were obtained by slow diffusion of anhydrous diethyl ether into a *N,N*-dimethylformamide solution of complex **3**. CCDC 2366467 contains the supplementary crystallographic data for this paper. The data can be obtained free of charge from The Cambridge Crystallographic Data Centre via [www.ccdc.cam.ac.uk/structures](http://www.ccdc.cam.ac.uk/structures).

**<sup>1</sup>H NMR** (400 MHz, DMSO-*d*<sub>6</sub>): δ 8.64 (s, 2H), 7.46 (d, *J* = 1.9 Hz, 2H), 7.35 (d, *J* = 1.9 Hz, 2H), 5.24 (d, *J* = 17.0 Hz, 2H), 4.70 (d, *J* = 17.1 Hz, 2H), 3.19 (s, 6H).

$^{13}\text{C}$  NMR (101 MHz, DMSO- $d_6$ )  $\delta$  167.4, 161.2, 143.7, 123.9, 121.5, 121.3, 120.8, 54.5, 36.2.

**Anal. Calcd.** for  $\text{C}_{18}\text{H}_{18}\text{Cl}_2\text{N}_6\text{NiO}_2 \cdot \text{DMF}$ : C, 45.60; H, 4.56; N, 17.73. Found: C, 45.55; H, 4.61; N, 17.88.

## References

- (S1) V. Fourmond, P.-A. Jacques, M. Fontecave and V. Artero, *Inorg. Chem.*, 2010, **49**, 10338–10347.
- (S2) H. M. Shahadat, H. A. Younus, N. Ahmad, M. A. Rahaman, Z. A. K. Khattak, S. Zhuiykov and F. Verpoort, *Catal. Sci. Technol.*, 2019, **9**, 5651–5659.
- (S3) S. E. Treimer and D. H. Evans, *J. Electroanal. Chem.*, 1998, **455**, 19–28.
- (S4) P. D. Beer, N. G. Berry, A. R. Cowley, E. J. Hayes, E. C. Oates and W. W. H. Wong, *Chem. Comm.*, 2003, 2408–2409.
- (S5) K. V. Tan, J. L. Dutton, B. W. Skelton, D. J. D. Wilson and P. J. Barnard, *Organometallics*, 2013, **32**, 1913–1923.
- (S6) S. Luo, M. A. Siegler and E. Bouwman, *Eur. J. Inorg. Chem.*, 2016, **2016**, 4693–4700.
- (S7) S. Luo, M. A. Siegler and E. Bouwman, *Eur. J. Inorg. Chem.*, 2019, **2019**, 617–627.
- (S8) K. N. Brinda, Z. Yhobu, J. G. Małeckki, R. S. Keri, R. G. Balakrishna, D. H. Nagaraju and S. Budagumpi, *Int. J. Hydrogen Energy*, 2023, **48**, 10911–10921.
- (S9) A. L. Ostericher, K. M. Waldie and C. P. Kubiak, *ACS Catal.*, 2018, **8**, 9596–9603.
- (S10) S. Xue, X. Lv, N. Liu, Q. Zhang, H. Lei, R. Cao and F. Qiu, *Inorg. Chem.*, 2023, **62**, 1679–1685.
- (S11) Z.-Y. Wu, T. Wang, Y.-S. Meng, Y. Rao, B.-W. Wang, J. Zheng, S. Gao and J.-L. Zhang, *Chem. Sci.*, 2017, **8**, 5953–5961.
- (S12) F. Kamatsos, M. Drosou and C. A. Mitsopoulou, *Int. J. Hydrog. Energy*, 2021, **46**, 19705–19716.
- (S13) A. D. Wilson, R. K. Shoemaker, A. Miedaner, J. T. Muckerman, D. L. Dubois and M. R. Dubois, *Proc. Natl. Acad. Sci. U.S.A.*, 2007, **104**, 6951–6956.
- (S14) S. Norouziyanlakvan, G. K. Rao, J. Ovens, B. Gabidullin and D. Richeson, *Chem. Eur. J.*, 2021, **27**, 13518–13522.
- (S15) C. Hu, R. J. Chew, H. M. Tang, S. Madrahimov, A. A. Bengali and W. Y. Fan, *Mol. Catal.*, 2020, **490**, 110950.

**Table S1.** Selected Bond Lengths (Å) and Deviation from Planarity (Å) for **1** – **3**

|                                       | <b>1</b> (CCDC 2366466) | <b>2</b> <sup>a</sup> | <b>3</b> (CCDC 2366467) |
|---------------------------------------|-------------------------|-----------------------|-------------------------|
| Ni–N <sub>amide</sub>                 | 1.915(2)                | 1.917(2)              | 1.908(2)                |
|                                       | 1.904(2)                | 1.906(2)              | 1.904(2)                |
| Ni–C <sub>carbene</sub>               | 1.852(3)                | 1.857(3)              | 1.848(2)                |
|                                       | 1.857(3)                | 1.851(3)              | 1.849(2)                |
| deviation from planarity <sup>b</sup> | 0.5334                  | 0.5117                | 0.4723                  |
|                                       | 0.5377                  | 0.5106                | 0.5182                  |
| $\tau_4$                              | 0.2386                  | 0.2286                | 0.2208                  |

<sup>a</sup>Taken from Ref. S5. <sup>b</sup>Distance between the carbene carbon atoms (C1 and C2) and the plane defined by N1, N2, and Ni1.



**Table S2.** Crystal / Refinement data for **1 – 3**

|                                                              | <b>1</b> (CCDC 2366466)                                                                                 | <b>2<sup>a</sup></b>                                                           | <b>3</b> (CCDC 2366467)                                                                                              |
|--------------------------------------------------------------|---------------------------------------------------------------------------------------------------------|--------------------------------------------------------------------------------|----------------------------------------------------------------------------------------------------------------------|
| Empirical formula                                            | 3(C <sub>18</sub> H <sub>24</sub> N <sub>6</sub> NiO <sub>2</sub> )·2(C <sub>3</sub> H <sub>7</sub> NO) | C <sub>37</sub> H <sub>40</sub> N <sub>12</sub> O <sub>5</sub> Ni <sub>2</sub> | C <sub>18</sub> H <sub>16</sub> Cl <sub>2</sub> N <sub>6</sub> NiO <sub>2</sub> ·2(C <sub>3</sub> H <sub>7</sub> NO) |
| Formula weight                                               | 1391.61                                                                                                 | 850.23                                                                         | 624.17                                                                                                               |
| Temperature / K                                              | 293                                                                                                     | 173                                                                            | 293                                                                                                                  |
| Crystal system                                               | Monoclinic                                                                                              | Tetragonal                                                                     | Monoclinic                                                                                                           |
| Space group                                                  | <i>I</i> 2                                                                                              | P4 <sub>3</sub> 2 <sub>1</sub> 2                                               | <i>P</i> 2 <sub>1</sub> / <i>c</i>                                                                                   |
| <i>a</i> / Å                                                 | 11.4069(2)                                                                                              | 11.3453(16)                                                                    | 15.0789(4)                                                                                                           |
| <i>b</i> / Å                                                 | 11.1844(2)                                                                                              | 11.3453(16)                                                                    | 10.4388(3)                                                                                                           |
| <i>c</i> / Å                                                 | 27.0255(6)                                                                                              | 27.492(6)                                                                      | 17.9250(5)                                                                                                           |
| $\alpha$ / °                                                 | 90                                                                                                      | 90                                                                             | 90                                                                                                                   |
| $\beta$ / °                                                  | 91.7110(17)                                                                                             | 90                                                                             | 99.317(3)                                                                                                            |
| $\gamma$ / °                                                 | 90                                                                                                      | 90                                                                             | 90                                                                                                                   |
| Volume / Å <sup>3</sup>                                      | 3446.36(12)                                                                                             | 3538.7(10)                                                                     | 2784.27(14)                                                                                                          |
| <i>Z</i>                                                     | 2                                                                                                       | 4                                                                              | 4                                                                                                                    |
| $\rho_{\text{calc}}$ mg/mm <sup>3</sup>                      | 1.341                                                                                                   | 1.596                                                                          | 1.489                                                                                                                |
| $\mu$ /mm <sup>-1</sup>                                      | 0.877                                                                                                   | 1.129                                                                          | 0.935                                                                                                                |
| F(000)                                                       | 1468                                                                                                    | 1768                                                                           | 1296                                                                                                                 |
| Crystal size /mm <sup>3</sup>                                | 0.025 × 0.024 × 0.023                                                                                   | 0.2 × 0.2 × 0.1                                                                | 0.50 × 0.40 × 0.40                                                                                                   |
| Wavelength / Å                                               | Mo <i>K</i> $\alpha$ , 0.71073                                                                          | Mo <i>K</i> $\alpha$ , 0.71073                                                 | Mo <i>K</i> $\alpha$ , 0.71073                                                                                       |
| 2 $\theta$ range for data collection                         | 3.9 to 28.8°                                                                                            | 5.08 to 51.36°                                                                 | 3.8 to 28.4°                                                                                                         |
| Index ranges                                                 | -14 ≤ <i>h</i> ≤ 14<br>-13 ≤ <i>k</i> ≤ 13<br>-33 ≤ <i>l</i> ≤ 33                                       | -10 ≤ <i>h</i> ≤ 13<br>-10 ≤ <i>k</i> ≤ 11<br>-20 ≤ <i>l</i> ≤ 33              | -18 ≤ <i>h</i> ≤ 19<br>-14 ≤ <i>k</i> ≤ 13<br>-22 ≤ <i>l</i> ≤ 22                                                    |
| Reflections                                                  | 27789                                                                                                   | 8850                                                                           | 18576                                                                                                                |
| Independent                                                  | 7020 [ <i>R</i> (int) = 0.0242]                                                                         | 3361 [ <i>R</i> (int) =                                                        | 6494 [ <i>R</i> (int) = 0.0292]                                                                                      |
| Data/restraints/parameters                                   | 7020/1/416                                                                                              | 3361/0/266                                                                     | 6494/0/358                                                                                                           |
| Goodness-of-fit on <i>F</i> <sup>2</sup>                     | 1.062                                                                                                   | 1.083                                                                          | 1.033                                                                                                                |
| Final <i>R</i> indexes [ <i>I</i> > 2 $\sigma$ ( <i>I</i> )] | <i>R</i> <sub>1</sub> = 0.0260,<br><i>wR</i> <sub>2</sub> = 0.0622                                      | <i>R</i> <sub>1</sub> = 0.0296,<br><i>wR</i> <sub>2</sub> = 0.0723             | <i>R</i> <sub>1</sub> = 0.0380,<br><i>wR</i> <sub>2</sub> = 0.0844                                                   |
| Final <i>R</i> indexes [all data]                            | <i>R</i> <sub>1</sub> = 0.0303,<br><i>wR</i> <sub>2</sub> = 0.0649                                      | <i>R</i> <sub>1</sub> = 0.0324,<br><i>wR</i> <sub>2</sub> = 0.0738             | <i>R</i> <sub>1</sub> = 0.0583,<br><i>wR</i> <sub>2</sub> = 0.0939                                                   |
| Largest diff. peak/hole/e Å <sup>-3</sup>                    | 0.267/-0.185                                                                                            | 0.28/-0.34                                                                     | 0.324/-0.277                                                                                                         |

<sup>a</sup>Taken from Ref. S5

**Table S3.** Selected Bond Distances (Å) and Angles (°) for **1** – **3**

| Identification code | <b>1</b> (CCDC 2366466) | <b>2</b> <sup>a</sup> | <b>3</b> (CCDC 2366467) |
|---------------------|-------------------------|-----------------------|-------------------------|
| Bond Distances (Å)  |                         |                       |                         |
| Ni1-N1              | 1.904(2)                | 1.917(2)              | 1.9041(16)              |
| Ni1-N2              | 1.915(2)                | 1.906(2)              | 1.9084(16)              |
| Ni1-C1              | 1.852(3)                | 1.857(3)              | 1.849(2)                |
| Ni1-C2              | 1.857(3)                | 1.851(3)              | 1.848(2)                |
| Bond Angles (°)     |                         |                       |                         |
| N1-Ni1-N2           | 87.32(11)               | 86.01(9)              | 86.21(7)                |
| N1-Ni1-C1           | 91.73(11)               | 93.24(10)             | 92.40(8)                |
| N2-Ni1-C2           | 91.21(12)               | 91.08(12)             | 92.96(8)                |
| C1-Ni1-C2           | 94.42(12)               | 93.89(13)             | 92.46(9)                |
| N1-Ni1-C2           | 163.13(12)              | 163.74(11)            | 163.69(8)               |
| N2-Ni1-N3           | 163.23(12)              | 164.02(11)            | 165.16(8)               |

<sup>a</sup>Taken from Ref. S5

**Table S4.** Comparison of the Electrocatalytic HER Performance of the Nickel Complex Described in This Work with the Reported Ones

| Cat.                                                                                | Overpotential (mV) | Proton source                                           | Potential <sup>a</sup>        | Faraday efficiency | TOF (s <sup>-1</sup> ) | Ref.      |
|-------------------------------------------------------------------------------------|--------------------|---------------------------------------------------------|-------------------------------|--------------------|------------------------|-----------|
| <b>1</b>                                                                            | 780                | CF <sub>3</sub> CO <sub>2</sub> H in CH <sub>3</sub> CN | -1.60 V vs Fc/Fc <sup>+</sup> | 45%                | 316                    | this work |
| <b>2</b>                                                                            | 770                | CF <sub>3</sub> CO <sub>2</sub> H in CH <sub>3</sub> CN | -1.60 V vs Fc/Fc <sup>+</sup> | 54%                | 409                    | this work |
| <b>3</b>                                                                            | 760                | CF <sub>3</sub> CO <sub>2</sub> H in CH <sub>3</sub> CN | -1.60 V vs Fc/Fc <sup>+</sup> | 64%                | 698                    | this work |
| 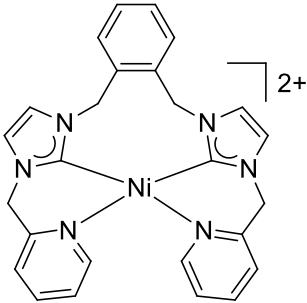   | 1280               | CH <sub>3</sub> CO <sub>2</sub> H in DMF                | -                             | -                  | 490                    | S6        |
|   | 860                | CH <sub>3</sub> CO <sub>2</sub> H in DMF                | -1.80 V vs Fc/Fc <sup>+</sup> | 85%                | 240                    | S7        |
|  | 347                | 0.5 M H <sub>2</sub> SO <sub>4</sub>                    | -                             | -                  | -                      | S8        |
|  | 400                | C <sub>6</sub> H <sub>5</sub> OH in CH <sub>3</sub> CN  | -1.90 V vs Fc/Fc <sup>+</sup> | -                  | 1000                   | S9        |
|  | 330                | CF <sub>3</sub> CO <sub>2</sub> H in CH <sub>3</sub> CN | -1.65 V vs Fc/Fc <sup>+</sup> | 94%                | 175                    | S10       |

|                                                                                     |     |                                                         |                                  |       |      |     |
|-------------------------------------------------------------------------------------|-----|---------------------------------------------------------|----------------------------------|-------|------|-----|
| 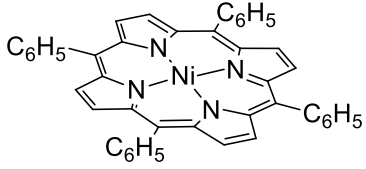   | 930 | CF <sub>3</sub> CO <sub>2</sub> H in CH <sub>3</sub> CN | -                                | > 90% | 6287 | S11 |
|    | 910 | CF <sub>3</sub> CO <sub>2</sub> H in DMF                | -                                | -     | 46   | S12 |
|     | -   | H <sup>+</sup> -DMF(OTf)/DMF<br>in CH <sub>3</sub> CN   | -                                | -     | 350  | S13 |
|    | -   | H <sub>2</sub> O in CH <sub>3</sub> CN                  | -2.55 V vs<br>Fc/Fc <sup>+</sup> | 87%   | 160  | S14 |
|  | 700 | CF <sub>3</sub> CO <sub>2</sub> H in CH <sub>3</sub> CN | -2.50 V vs<br>Fc/Fc <sup>+</sup> | 37%   | -    | S15 |

<sup>a</sup>Potentials is the controlled potential electrolysis (CPE).

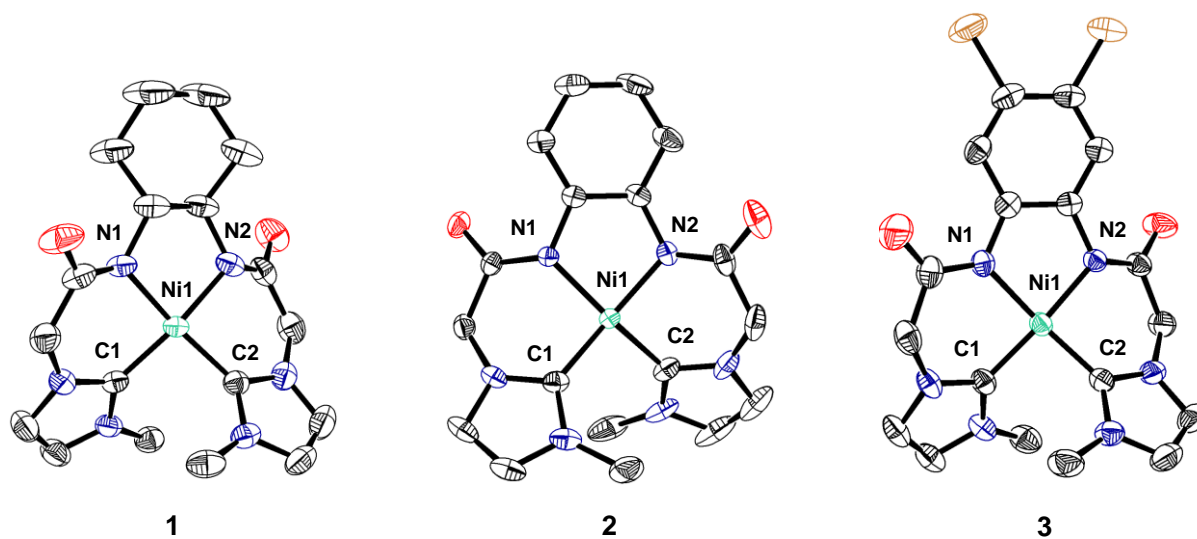

**Fig. S1.** X-ray crystal structures of **1** – **3** as an ORTEP drawing with 50% probability ellipsoids (Ni, medium aquamarine; N, new midnight blue; O, red; Cl, gold; C, black).

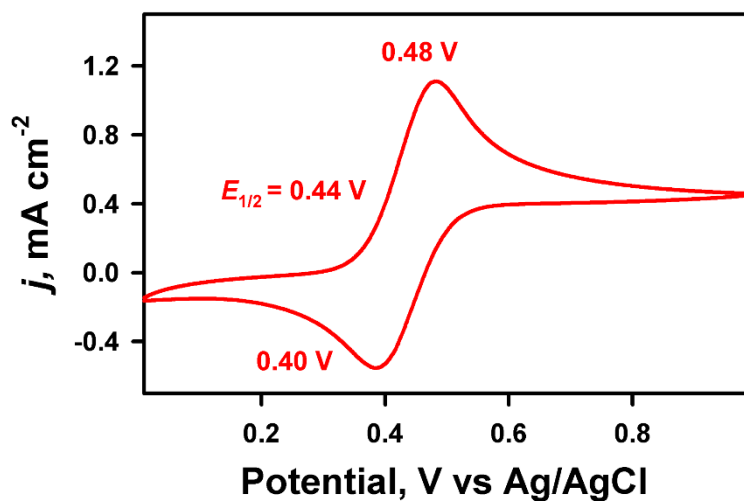

**Fig. S2.** CV of 1.0 mM ferrocene in deaerated CH<sub>3</sub>CN. Conditions: 0.1 M *n*-Bu<sub>4</sub>NPF<sub>6</sub>, GC working electrode, 100 mV s<sup>-1</sup> scan rate, 25 °C.

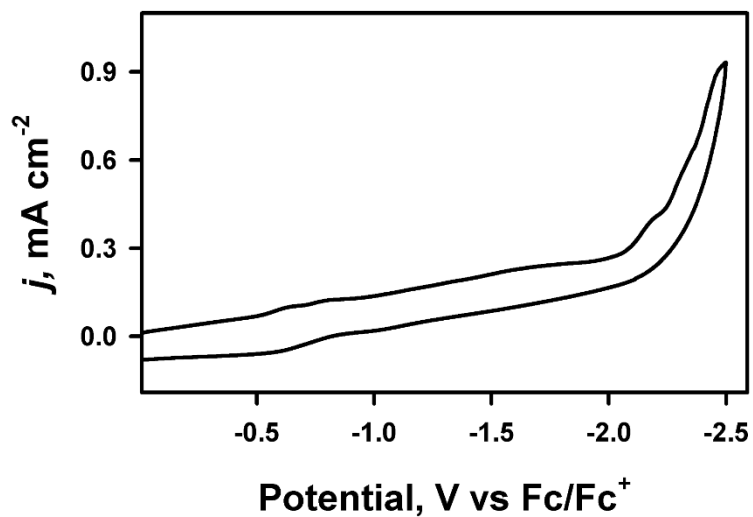

**Fig. S3.** CV of 1.0 mM L1 in deaerated CH<sub>3</sub>CN. Conditions: 0.1 M *n*-Bu<sub>4</sub>NPF<sub>6</sub>, GC working electrode, 100 mV s<sup>-1</sup> scan rate, 25 °C.

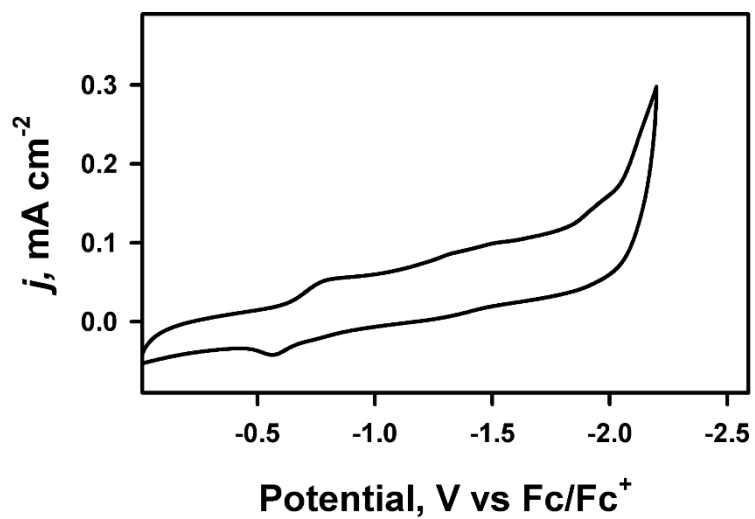

**Fig. S4.** CV of 1.0 mM **L2** in deaerated CH<sub>3</sub>CN. Conditions: 0.1 M *n*-Bu<sub>4</sub>NPF<sub>6</sub>, GC working electrode, 100 mV s<sup>-1</sup> scan rate, 25 °C.



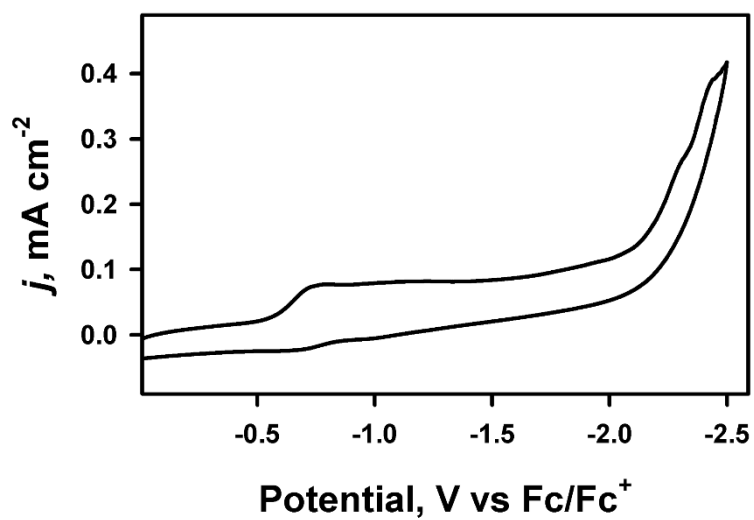

**Fig. S5.** CV of 1.0 mM **L3** in deaerated  $\text{CH}_3\text{CN}$ . Conditions: 0.1 M  $n\text{-Bu}_4\text{NPF}_6$ , GC working electrode,  $100 \text{ mV s}^{-1}$  scan rate,  $25 \text{ }^\circ\text{C}$ .

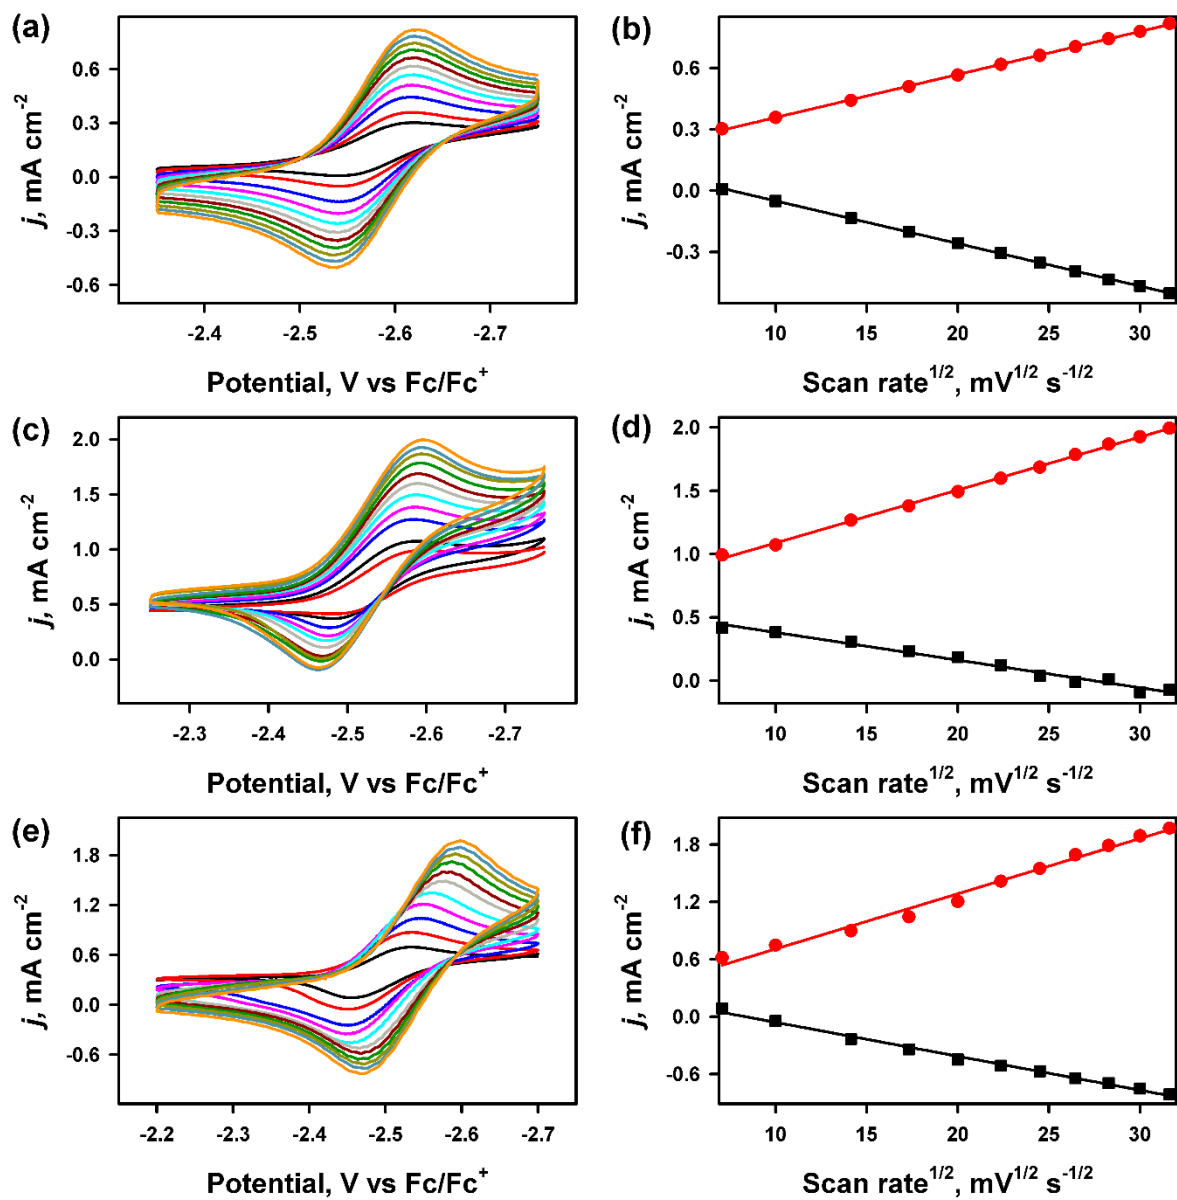

**Fig. S6.** CVs of 1 mM **1** (a), **2** (c) and **3** (e) in deaerated CH<sub>3</sub>CN at various scan rates (50 mV s<sup>-1</sup> to 1000 mV s<sup>-1</sup>) and corresponding Randles–Sevcik analysis (b, d, f). Conditions: 0.1 M *n*-Bu<sub>4</sub>NPF<sub>6</sub>, GC working electrode, 25 °C.

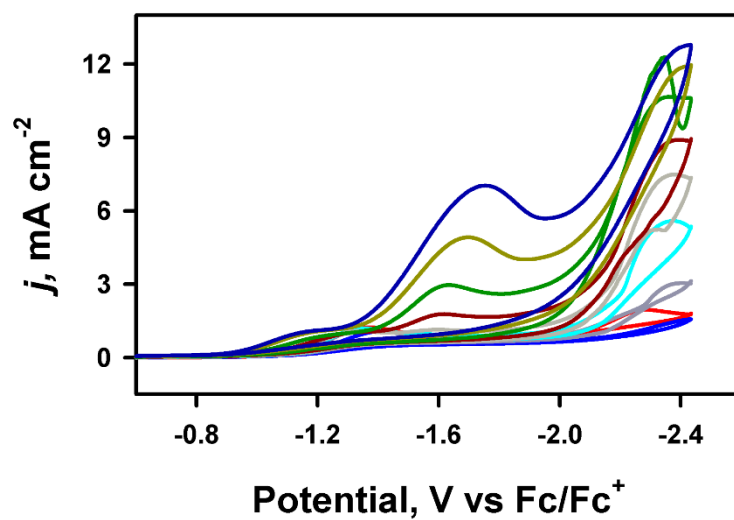

**Fig. S7.** CVs of increasing TFA concentration in the absence of nickel complex in deaerated CH<sub>3</sub>CN. Conditions: 0.1 M *n*-Bu<sub>4</sub>NPF<sub>6</sub>, GC working electrode, 100 mV s<sup>-1</sup> scan rate, 25 °C.

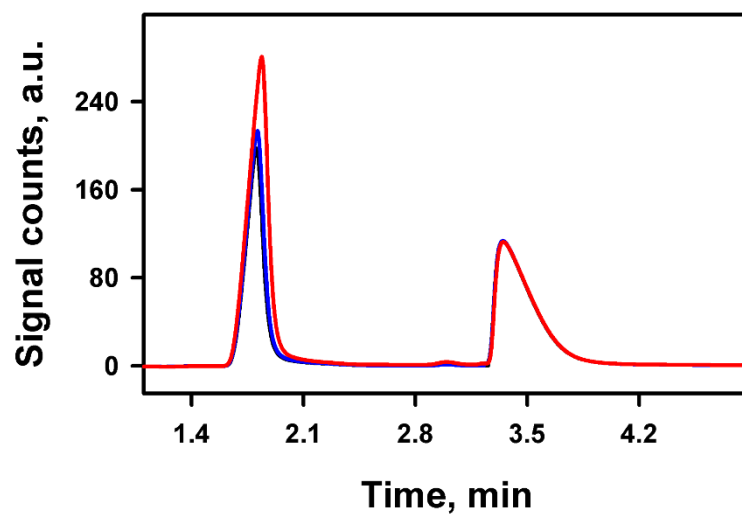

**Fig. S8.** GC plot of the gas collected from the headspace during the CPE experiment of complex **1** (black line), **2** (blue line), and **3** (red line).

**Additional Data:  $^1\text{H}$  and  $^{13}\text{C}$  NMR spectra**

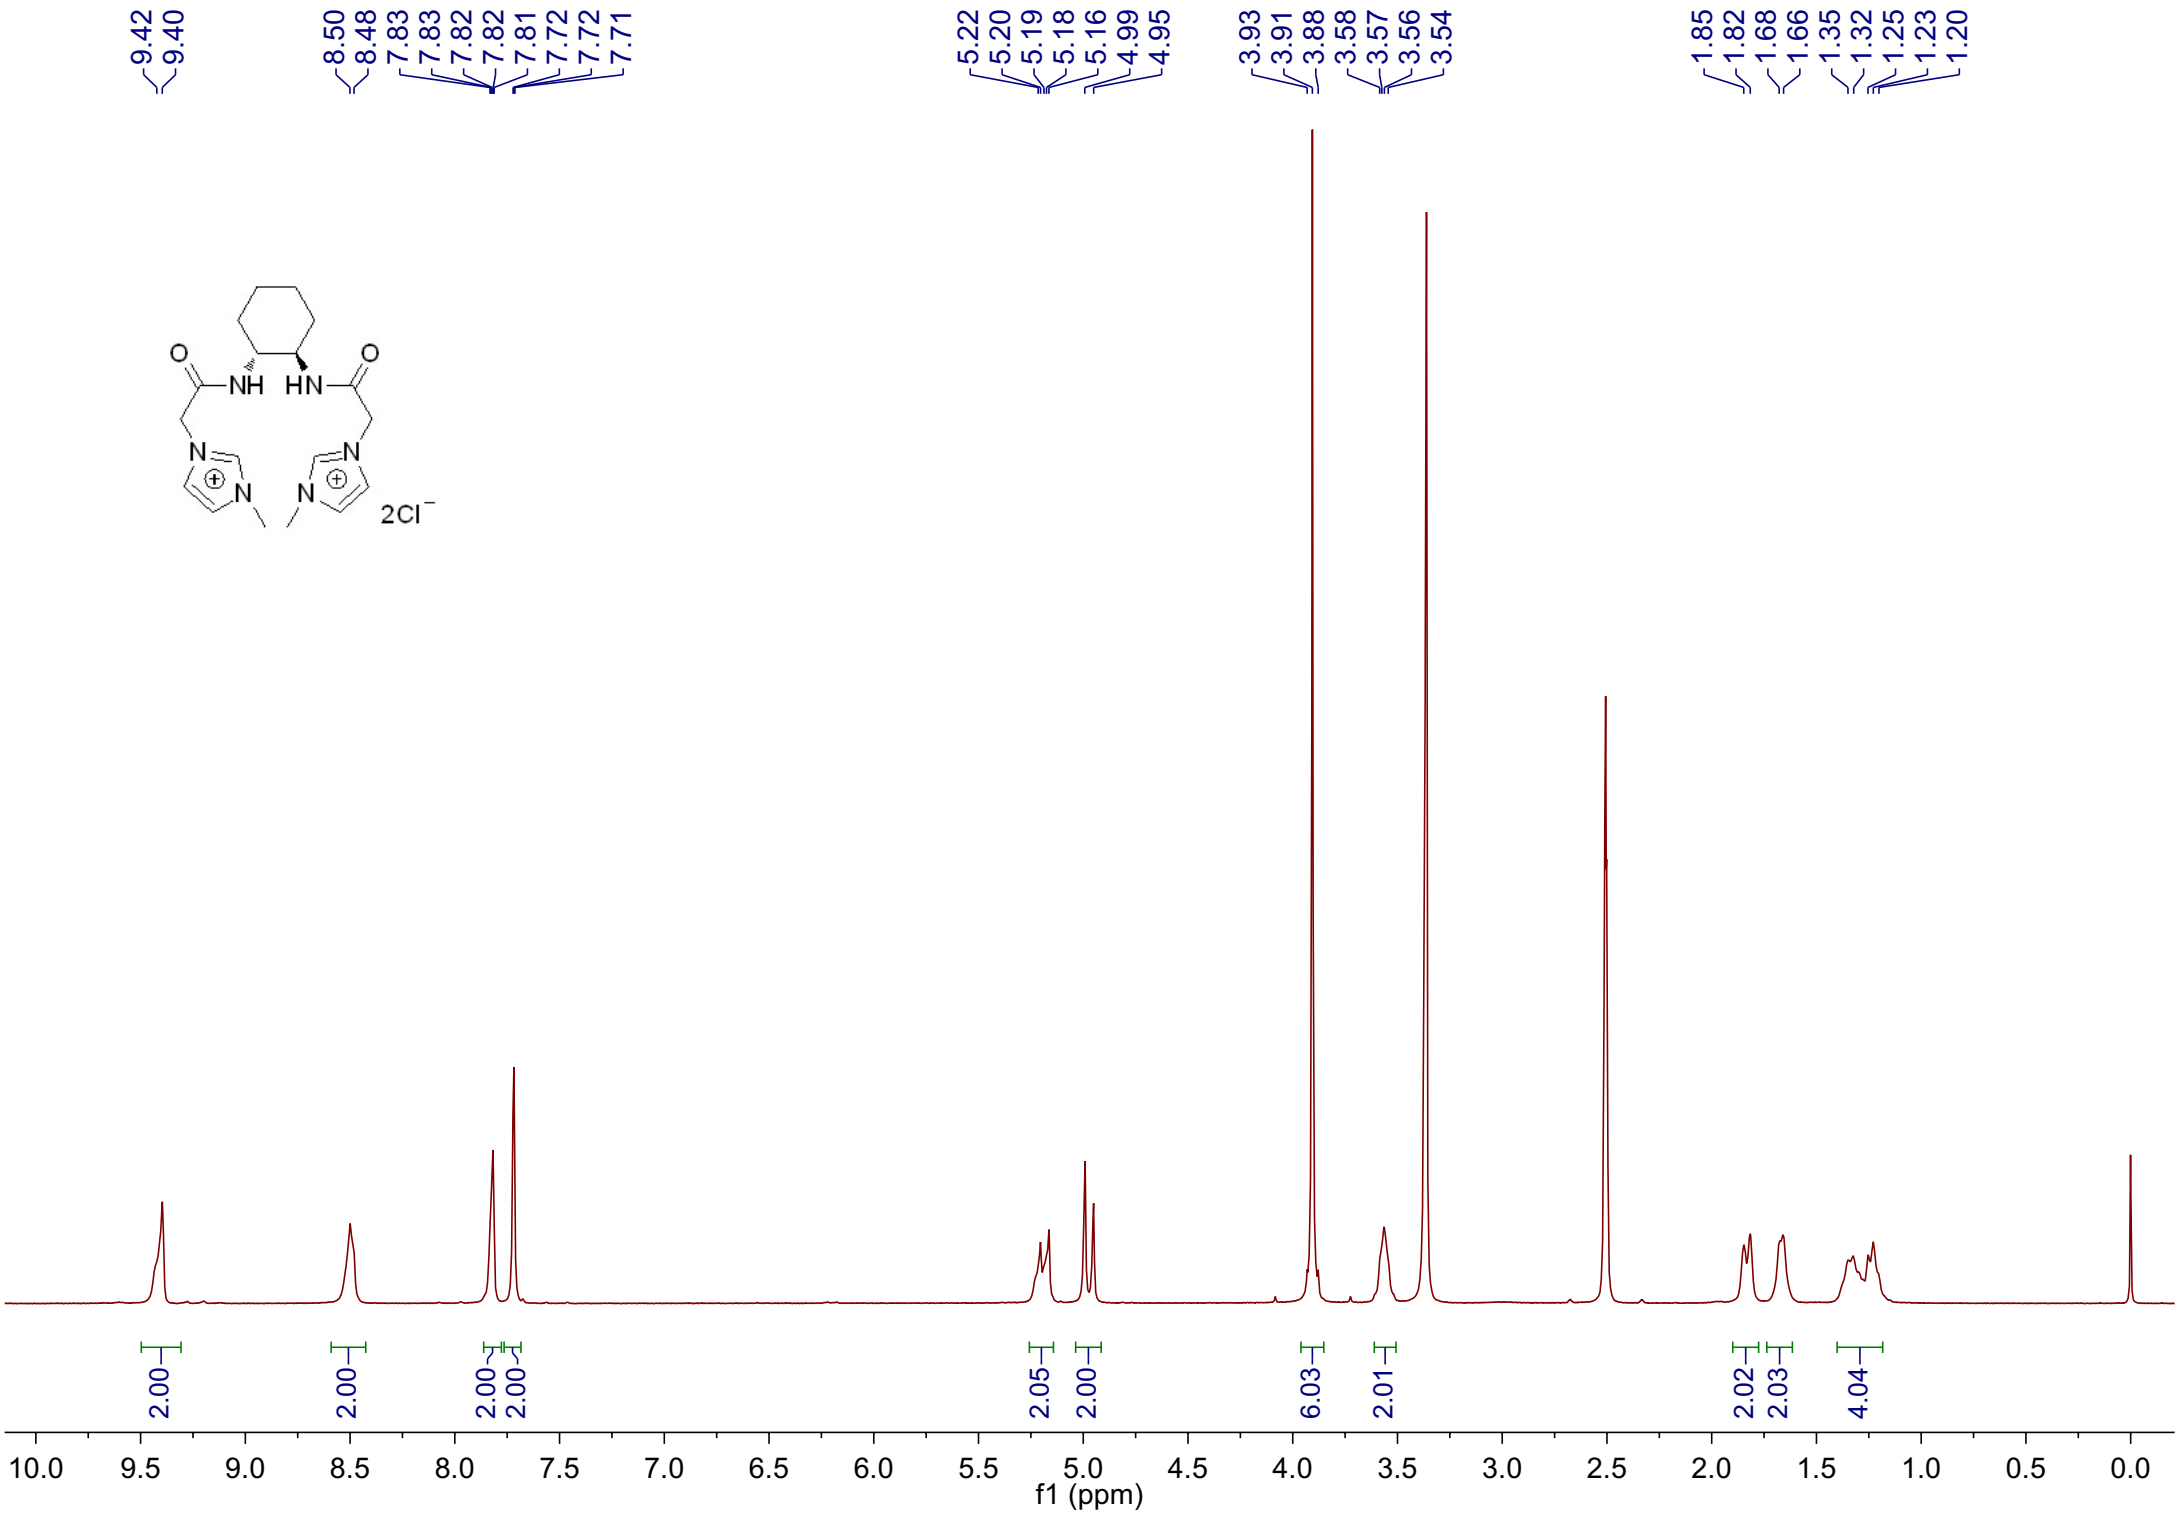

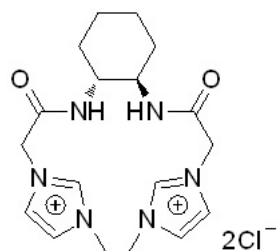

—164.7

—137.8

~123.8  
~122.8

~52.1  
~50.5

—35.8

—31.1

—24.0

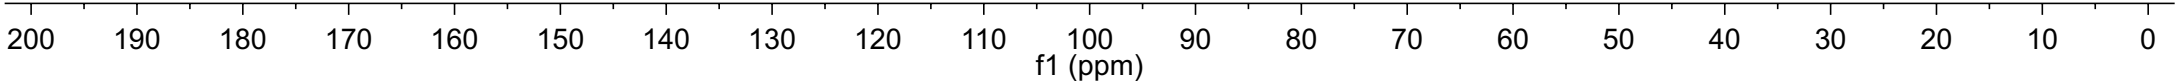

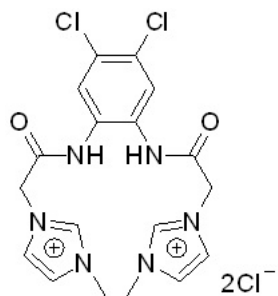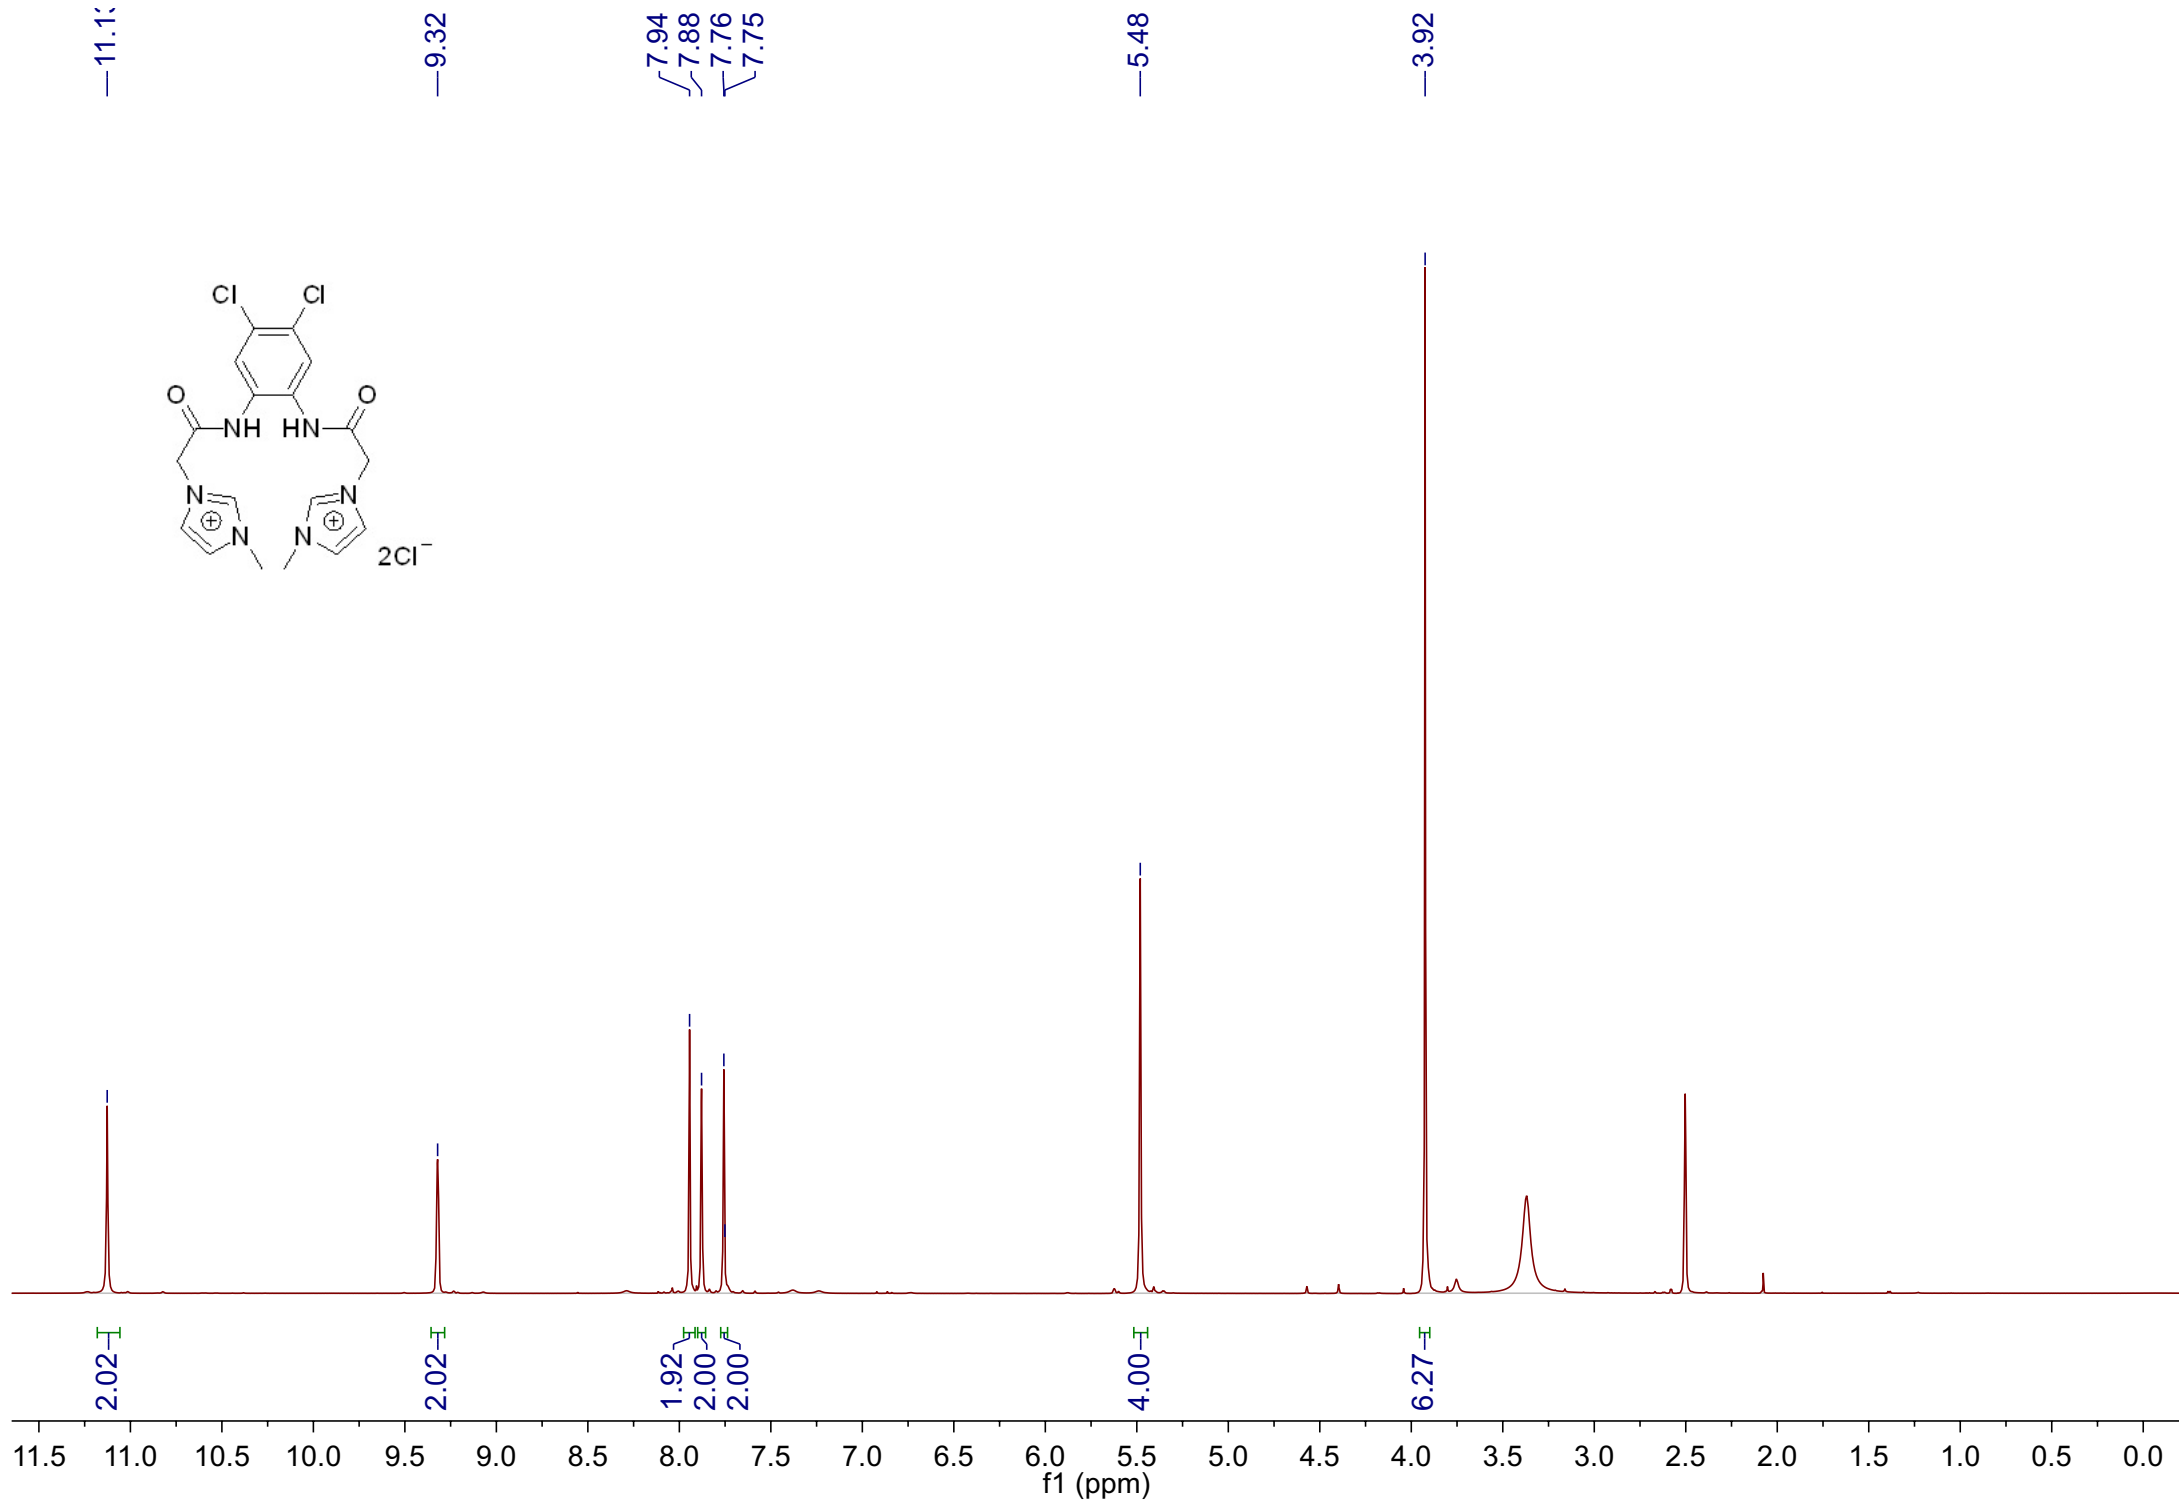



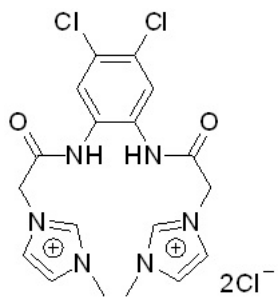

—164.8

138.1  
137.7  
129.7  
126.5  
125.5  
125.3  
123.9  
123.8  
123.1

—51.5

—35.9



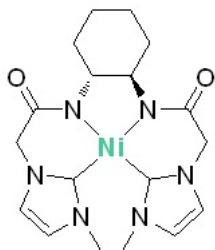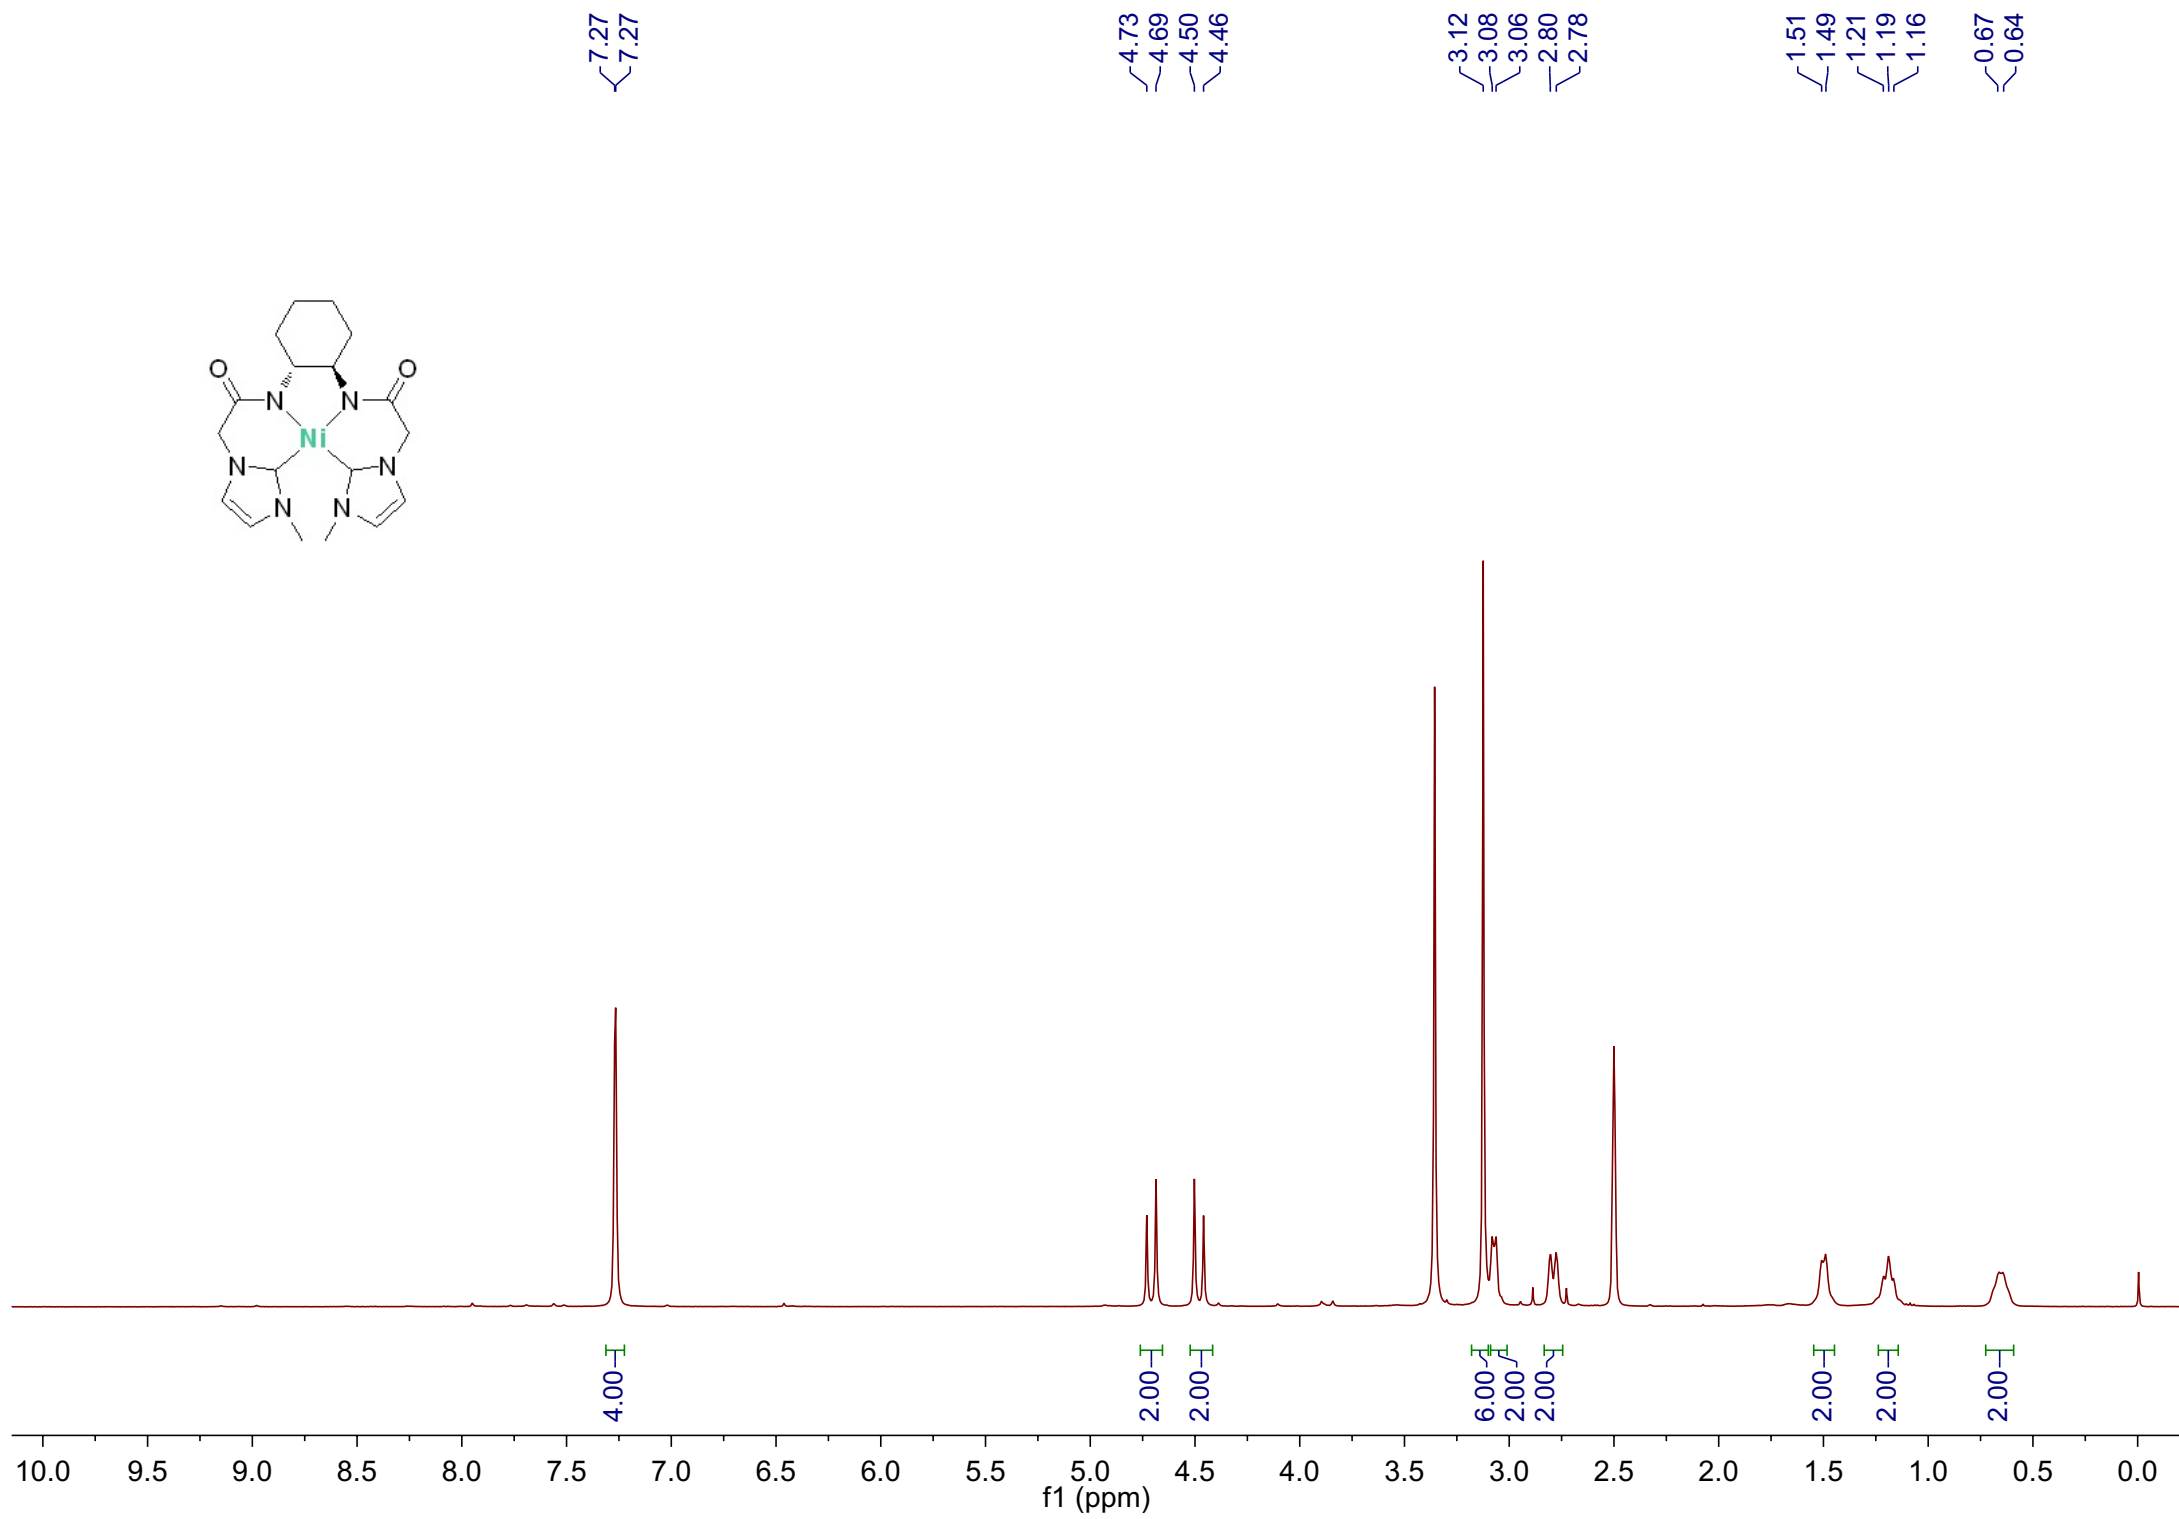

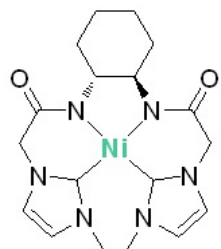

—169.7

—163.3

—123.7

—120.6

—68.4

—53.2

—36.3

—31.9

—25.6

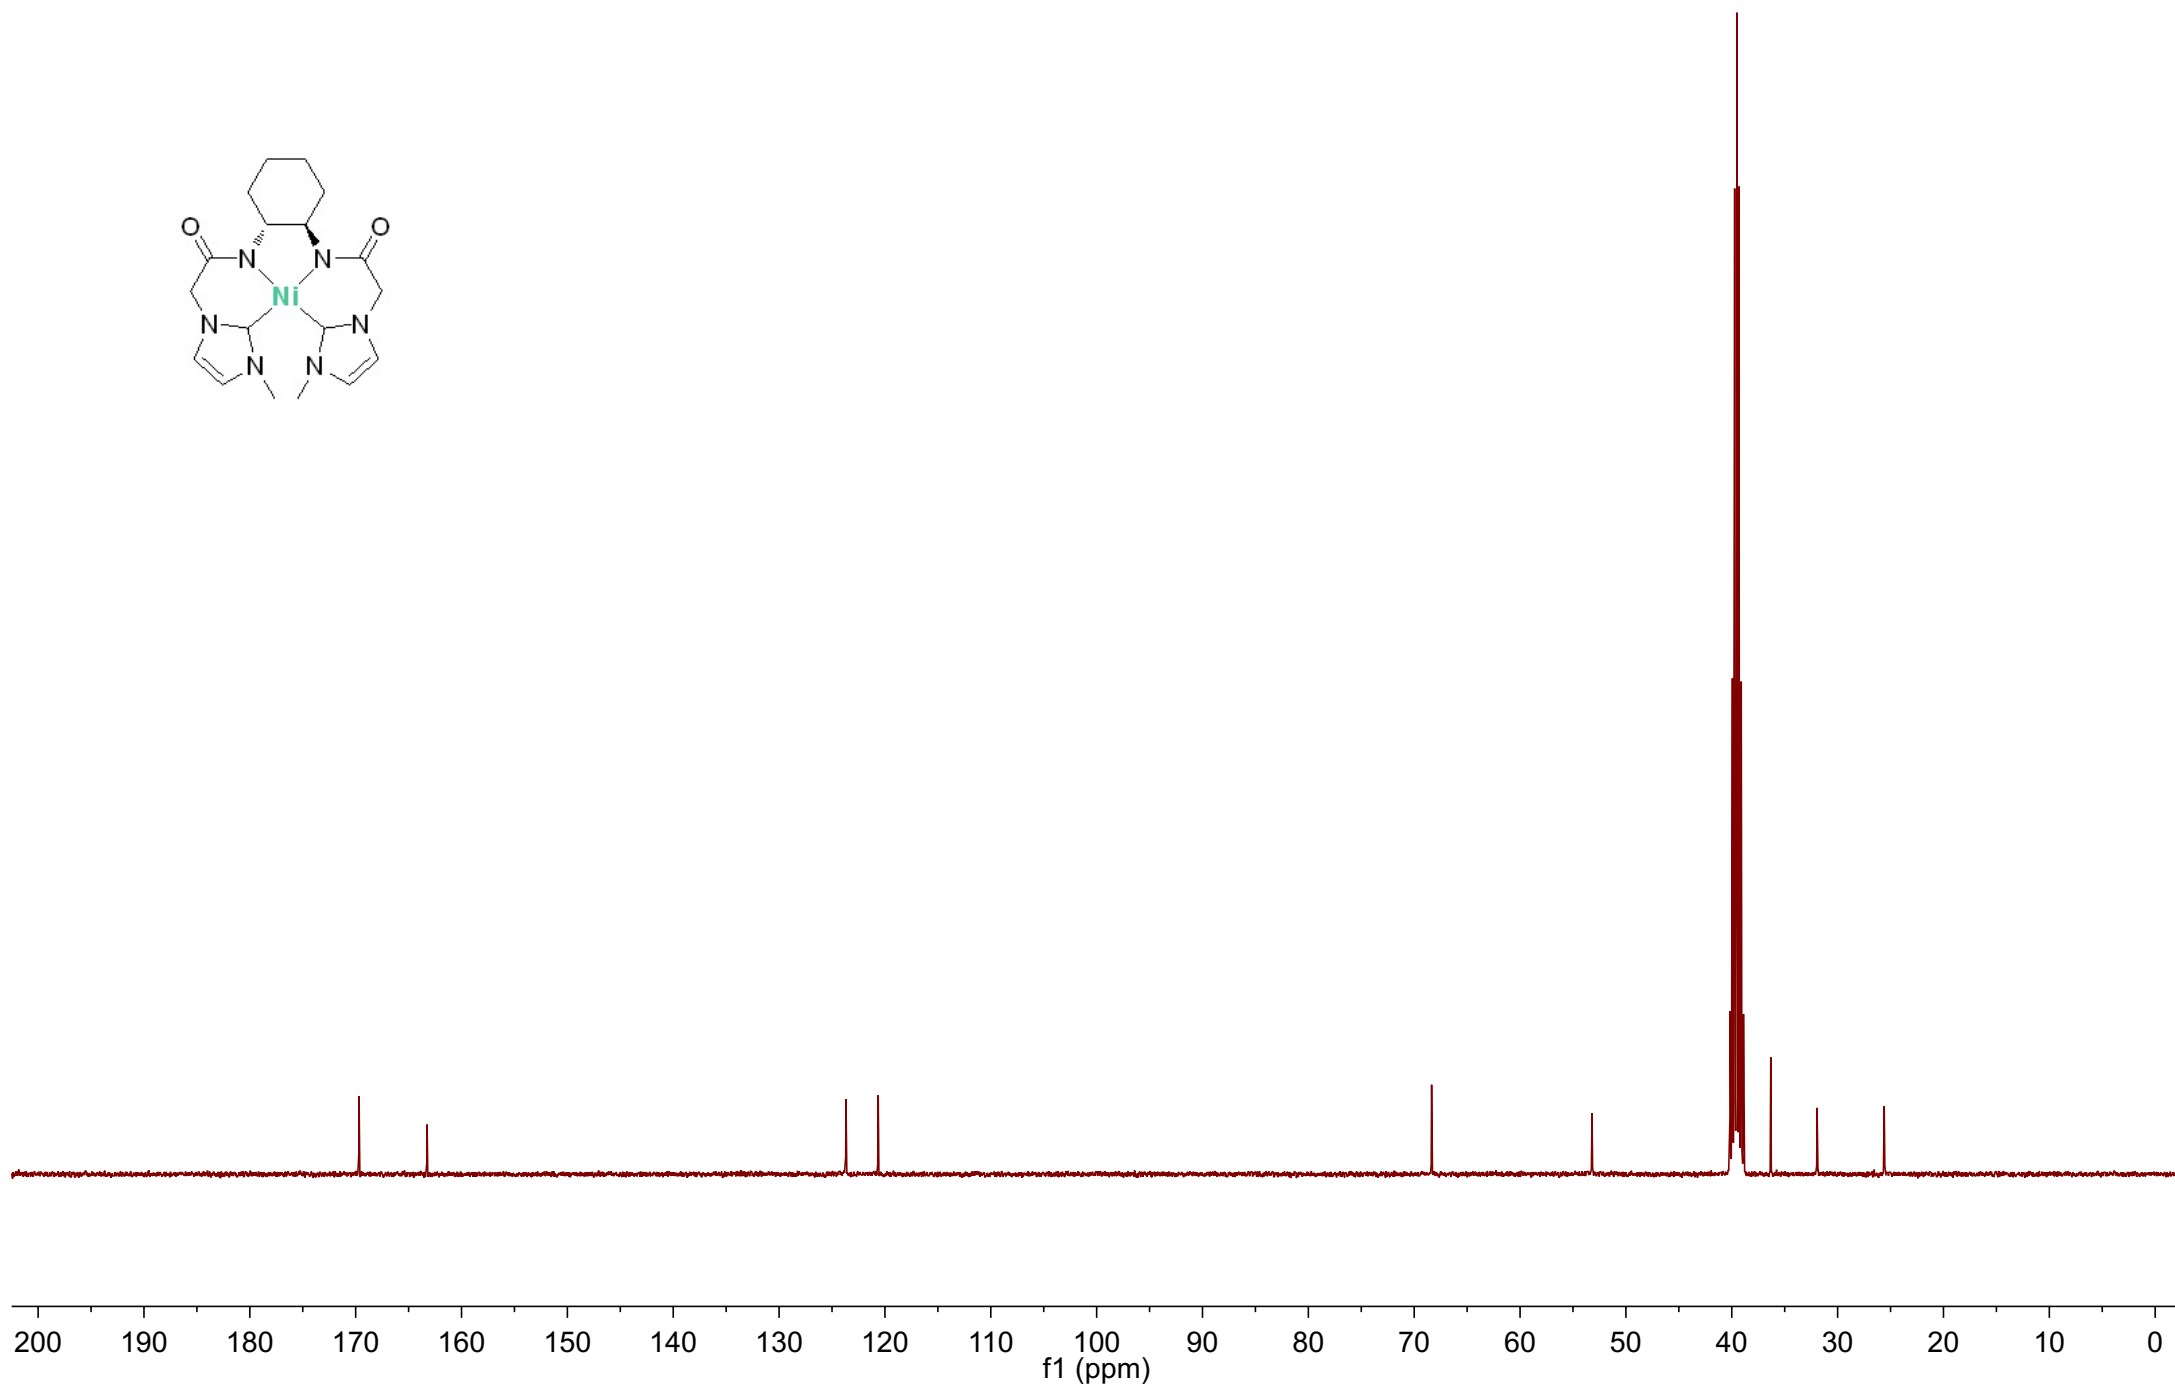

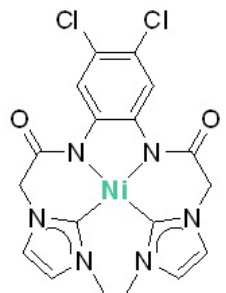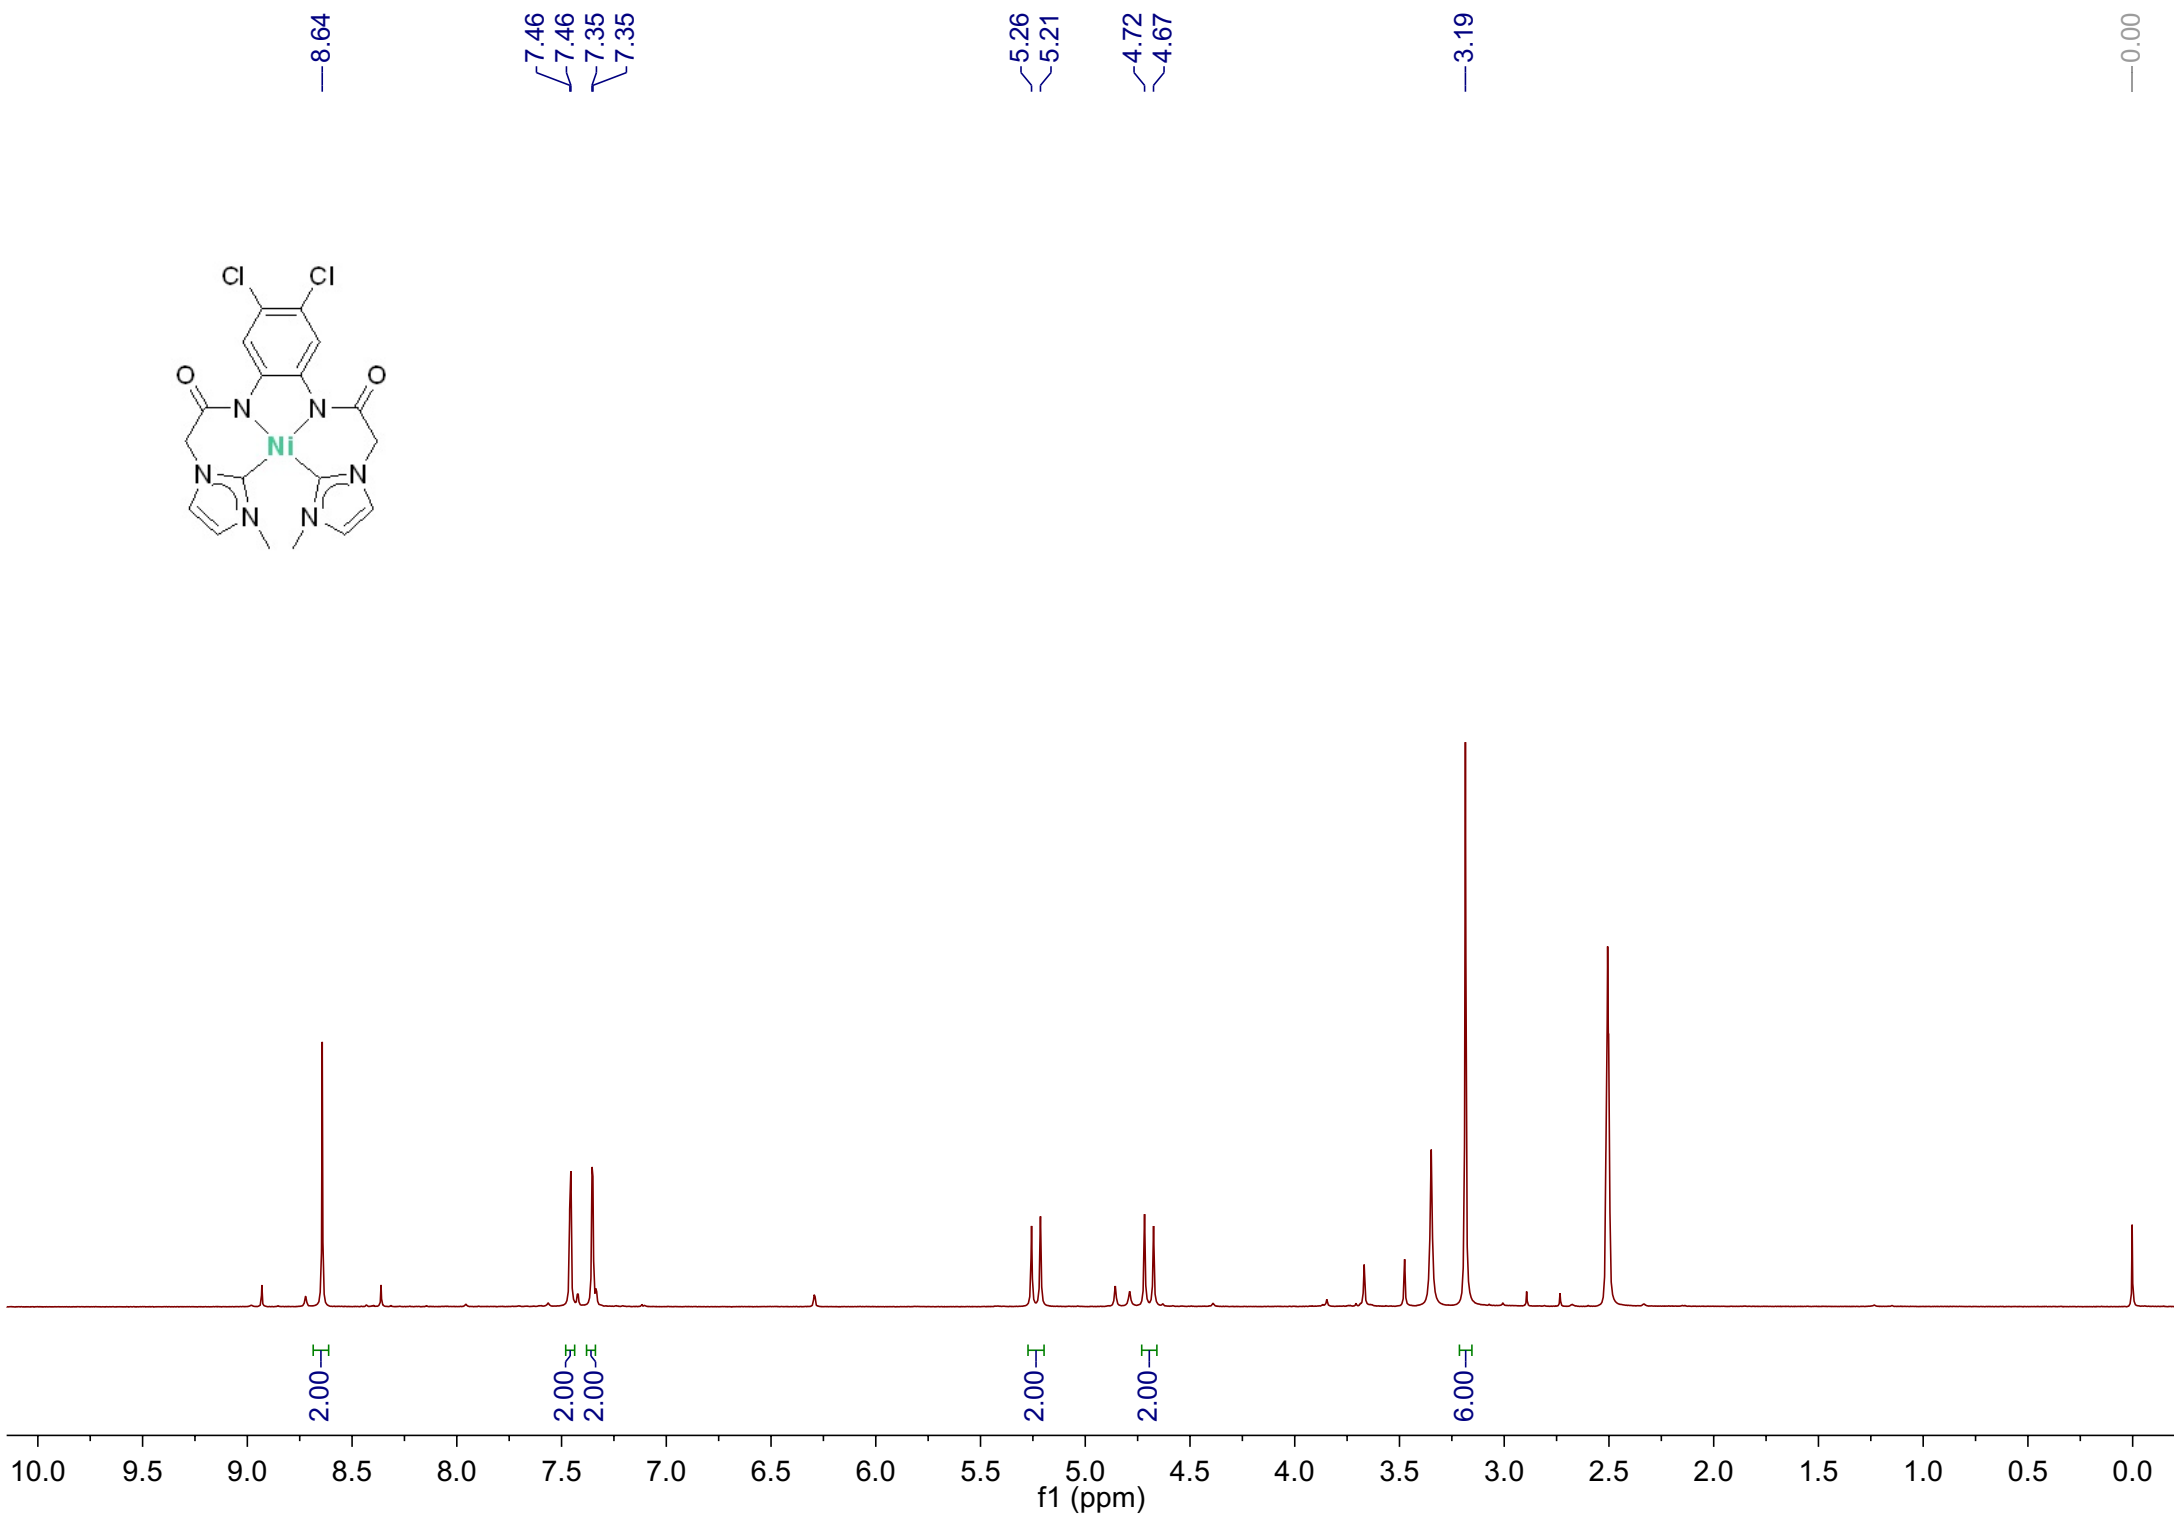

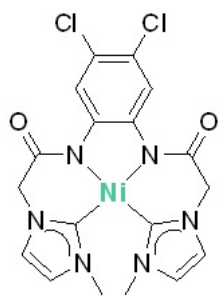

—167.4

—161.2

—143.7

—123.9

—121.5

—121.3

—120.8

—54.5

—36.2

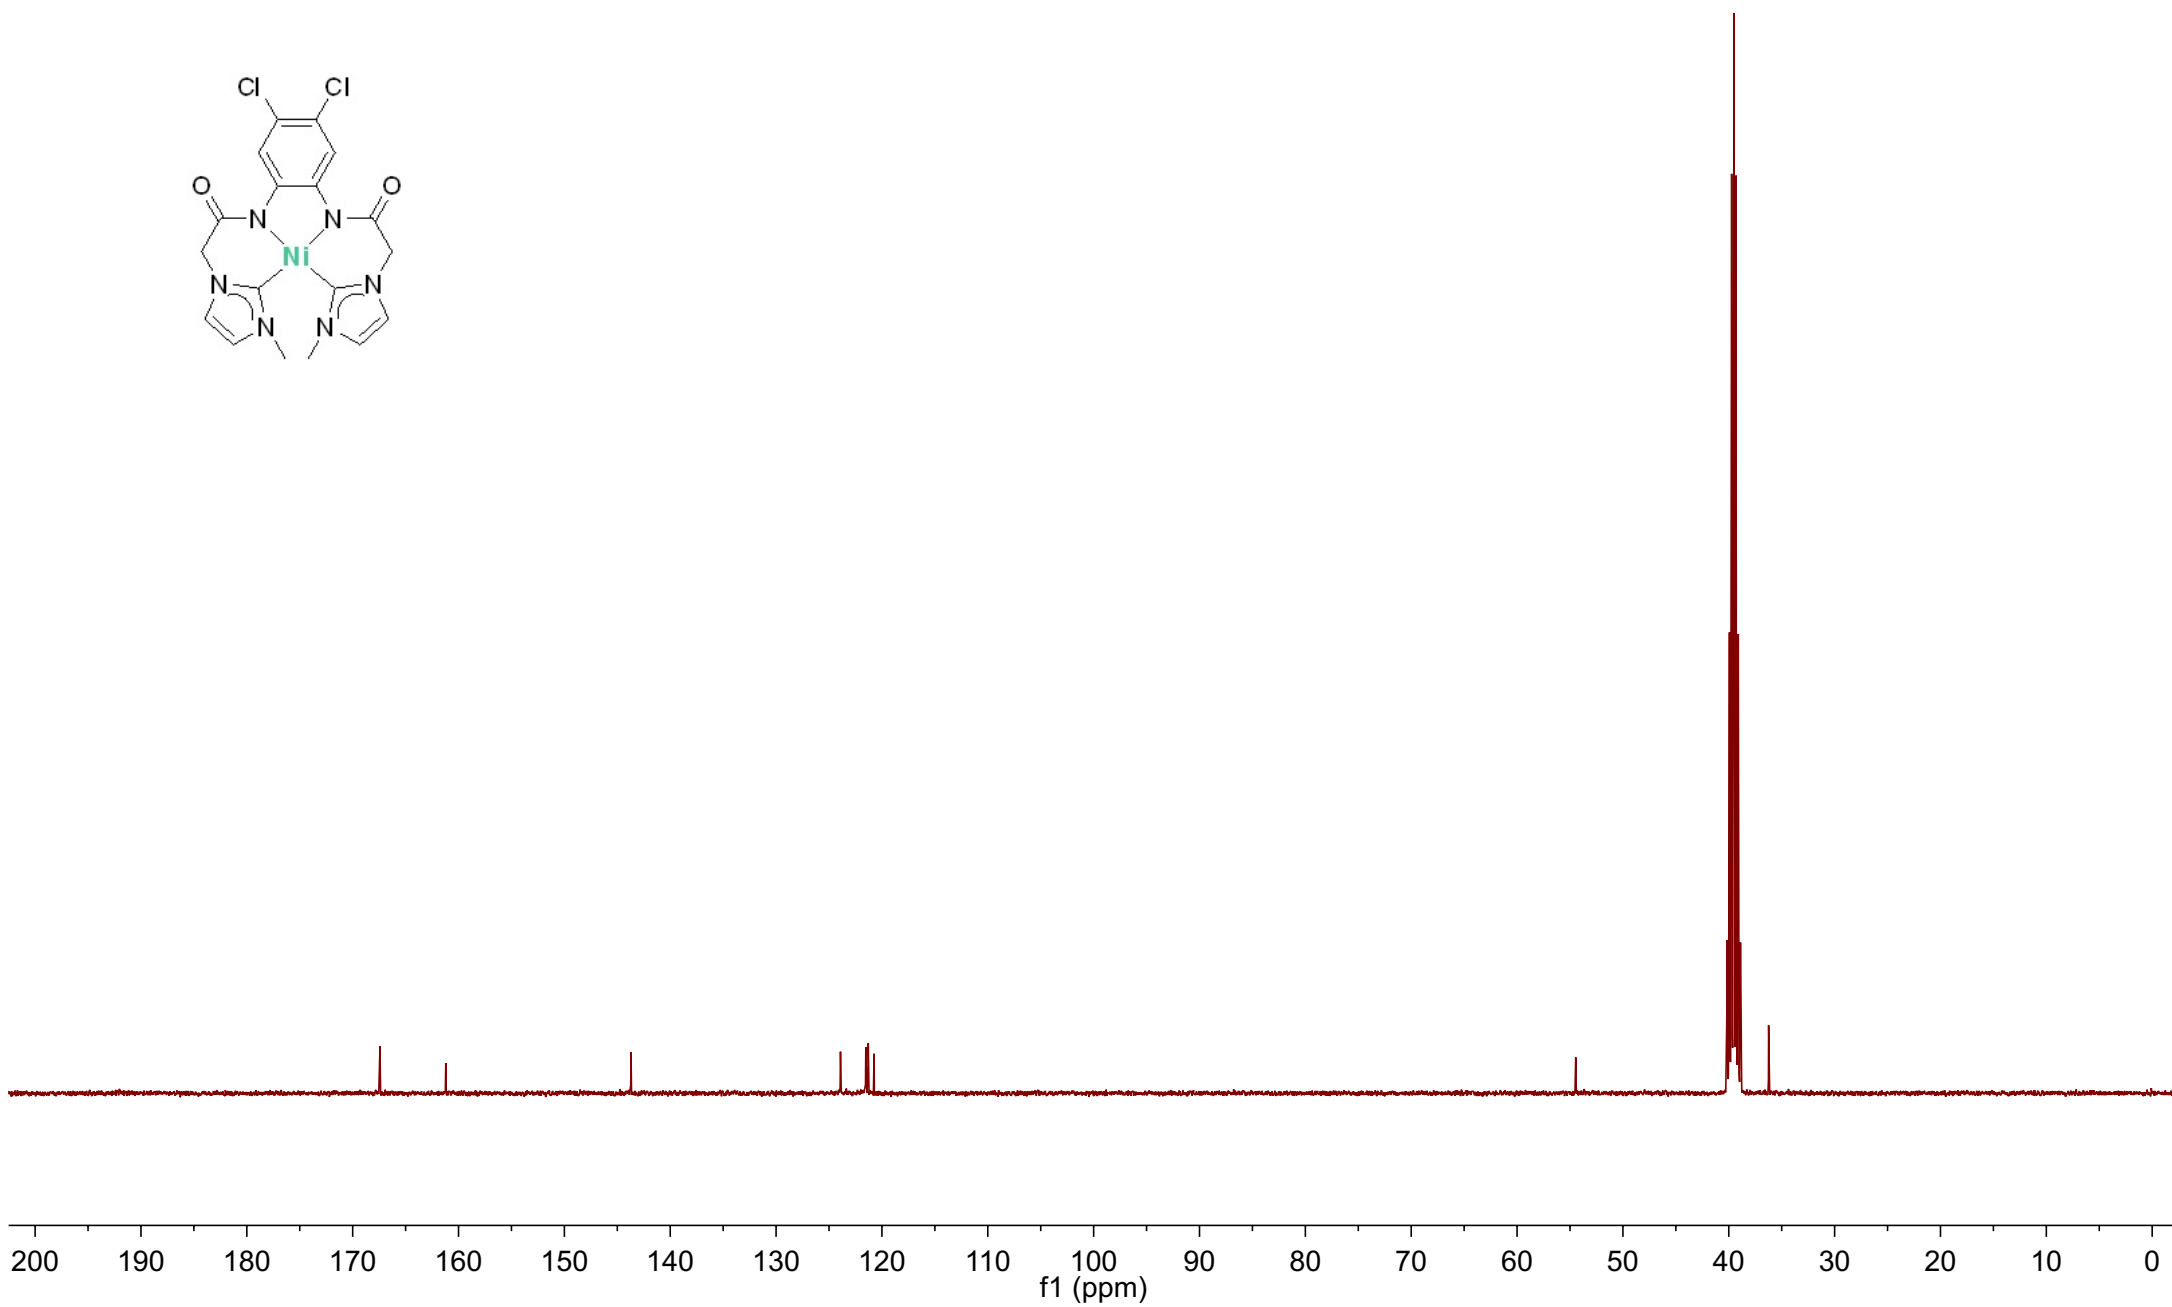

Supplement: d4dt02746a1.pdf [file d4dt02746a1.pdf]
